# Supplementary material for: SWI/SNF senses carbon starvation with a pH-sensitive low-complexity sequence
Source: eLife. 2022 Feb 7;11:e70344. doi: 10.7554/eLife.70344 (PMC8890752; doi:10.7554/eLife.70344)
Supplement: Supplementary file 1. — All S. cerevisiae QLCs identified using the parameters optimized in Figure 1—figure supplement 2 are included in this summary table. [file elife-70344-supp1.xlsx]

## Sheet: scere_QLCs
	Protein name and description	Start	End	Sequence
	YAL021C Chr1 complement(110846..113359) [2514 bp; 837 aa] {ON} CCR4Component of the CCR4-NOT transcriptional complex; which is involved in regulation of gene expression; component of the major cytoplasmic deadenylase; which is involved in mRNA poly(A) tail shortening	159	245	QLHLAAVSAQSLGQPNIYARQNAMKKYLATQQAQQAQQQAQQQAQQQVPGPFGPGPQAAPPALQPTDFQQSHIAEASKSLVDCTKQ
	YBL051C Chr2 complement(122753..124759) [2007 bp; 668 aa] {ON} PIN4Protein involved in G2/M phase progression and response to DNA damage; interacts with Rad53p; contains an RNA recognition motif; a nuclear localization signal; and several SQ/TQ cluster domains; hyperphosphorylated in response to DNA damage	454	508	QGQFSMQPTLTSPKMNIHHSSQYNSADQPQQPQPQTQQNVQSAAQQQQSFLRQQ
	YBR016W Chr2 (270247..270633) [387 bp; 128 aa] {ON} Tail-anchored plasma membrane protein containing a conserved CYSTM module; predicted to be palmitoylated; has similarity to hydrophilins; which are involved in the adaptive response to hyperosmotic conditions	15	104	QYSRPSNPPPSSAHQNKTQERGYPPQQQQQYYQQQQQHPGYYNQQGYNQQGYNQQGYNQQGYNQQGYNQQGYNQQGHQQPVYVQQQPPQ
	YBR059C Chr2 complement(356861..360187) [3327 bp; 1108 aa] {ON} AKL1Ser-Thr protein kinase; member (with Ark1p and Prk1p) of the Ark kinase family; involved in endocytosis and actin cytoskeleton organization	589	747	QQQGQRYQQAQNQTGTQGNTFPDESQYQSRVEQQQQQQDQPKGPANYSQRNFYTGRDRSNKPMQLGGTIAGDSGNRRVNFQNISQNYATNSQSGYLPSQNSPAIPMVRPVISMNQQQAQQIQAQQLQAQQMQAKQQMQAKQQMQVQQQLQVQQQMQIQ
	YBR108W Chr2 (454822..457665) [2844 bp; 947 aa] {ON} AIM3Protein interacting with Rvs167p; null mutant is viable and displays elevated frequency of mitochondrial genome loss	94	398	QKTYTGQQQQQMPNGQASYAFQGAYQGQPGAGSTEQSQYAQPQYNQYPQQQLQQGVMPQQQQLQQGVVPQQPPIYGEQVPPYGSNSNATSYQSLPQQNQPQNAIPSQVSLNSASQQSTGFVSQNLQYGTQSSNPAPSPSFQNGLQCHQQPQYVSHGSTNLGQSQFPSGQQQQPTTQFGQQVLPSPAQPQQQQQGQPLPPPRGQVILPAPGEPLSNGFGQQQQQQQQQQQPLNQNNALLPQMNVEGVSGMAAVQPVYGQAMSSTTNMQDSNPSYGASPMQGQPPVGGQPPVPVRMQPQPPQPMQQ
	YBR112C Chr2 complement(462870..465770) [2901 bp; 966 aa] {ON} CYC8General transcriptional co-repressor; acts together with Tup1p; also acts as part of a transcriptional co-activator complex that recruits the SWI/SNF and SAGA complexes to promoters; can form the prion [OCT+]	6	43	QTIMEQPAQQQQQQQQQQQQQQQQAAVPQQPLDPLTQ
	YBR112C Chr2 complement(462870..465770) [2901 bp; 966 aa] {ON} CYC8General transcriptional co-repressor; acts together with Tup1p; also acts as part of a transcriptional co-activator complex that recruits the SWI/SNF and SAGA complexes to promoters; can form the prion [OCT+]	437	682	QPTLQPNDQGNPLNTRISAQSANATASMVQQQHPAQQTPINSSATMYSNGASPQLQAQAQAQAQAQAQAQAQAQAQAQAQAQAQAQAQAQAQAQAQAQAHAQAQAQAQAQAQAQAQAQAQQQQQQQQQQQQQQQQQQQQQQQQQQQQQQQLQPLPRQQLQQKGVSVQMLNPQQGQPYITQPTVIQAHQLQPFSTQAMEHPQSSQLPPQQQQLQSVQHPQQLQGQPQAQAPQPLIQHNVEQNVLPQ
	YBR135W Chr2 (504854..505306) [453 bp; 150 aa] {ON} CKS1Cyclin-dependent protein kinase regulatory subunit and adaptor; modulates proteolysis of M-phase targets through interactions with the proteasome; role in transcriptional regulation; recruiting proteasomal subunits to target gene promoters	117	148	QQQQQQQQQQQQQQQQHQTQSISNDMQVPPQ
	YBR198C Chr2 complement(616127..618523) [2397 bp; 798 aa] {ON} TAF5Subunit (90 kDa) of TFIID and SAGA complexes; involved in RNA polymerase II transcription initiation and in chromatin modification	2	48	QKQSTNQNQNGTHQPQPVKNQRTNNAAGANSGQQPQQQSQGQSQQQ
	YBR212W Chr2 (647886..649904) [2019 bp; 672 aa] {ON} NGR1RNA binding protein that negatively regulates growth rate; interacts with the 3' UTR of the mitochondrial porin (POR1) mRNA and enhances its degradation; overexpression impairs mitochondrial function; interacts with Dhh1p to mediate POR1 mRNA decay; expressed in stationary phase	259	315	QGRALRVAYATPRNNMMLQLQEQQQQQQQLQQQHQQLDQEDNNGPLLIKTANNLIQ
	YBR289W Chr2 (779667..782384) [2718 bp; 905 aa] {ON} SNF5Subunit of the SWI/SNF chromatin remodeling complex involved in transcriptional regulation; functions interdependently in transcriptional activation with Snf2p and Snf6p	30	313	QIPQQLYQSLTPQQLQMIQQRHQQLLRSRLQQQQQQQQQTSPPPQTHQSPPPPPQQSQPIANQSATSTPPPPPAPHNLHPQIGQVPLAPAPINLPPQIAQLPLATQQQVLNKLRQQAIAKNNPQVVNAITVAQQQVQRQIEQQKGQQTAQTQLEQQRQLLVQQQQQQQLRNQIQRQQQQQFRHHVQIQQQQQKQQQQQQQHQQQQQQQQQQQQQQQQQQQQQQQQQQQQQQQQQQQQQGQIPQSQQVPQVRSMSGQPPTNVQPTIGQLPQLPKLNLPKYQTIQ
	YCL028W Chr3 (70150..71367) [1218 bp; 405 aa] {ON} RNQ1[PIN(+)] prion; an infectious protein conformation that is generally an ordered protein aggregate	220	319	QNSNNSQQGYNQSYQNGNQNSQGYNNQQYQGGNGGYQQQQGQSGGAFSSLASMAQSYLGGGQTQSNQQQYNQQGQNNQQQYQQQGQNYQHQQQGQQQQQ
	YCR077C Chr3 complement(250238..252628) [2391 bp; 796 aa] {ON} PAT1Topoisomerase II-associated deadenylation-dependent mRNA-decapping factor; also required for faithful chromosome transmission; maintenance of rDNA locus stability; and protection of mRNA 3'-UTRs from trimming; functionally linked to Pab1p	122	192	QSTMAPAPAPQQMAPLQPILSMQDLERQQRQMQQQFMNFHAMGHPQGLPQGPPQQQFPMQPASGQPGPSQ
	YCR084C Chr3 complement(260311..262452) [2142 bp; 713 aa] {ON} TUP1General repressor of transcription; forms complex with Cyc8p; involved in the establishment of repressive chromatin structure through interactions with histones H3 and H4; appears to enhance expression of some genes	85	131	QRDHQIASLTVQQQRQQQQQQQVQQHLQQQQQQLAAASASVPVAQQ
	YCR084C Chr3 complement(260311..262452) [2142 bp; 713 aa] {ON} TUP1General repressor of transcription; forms complex with Cyc8p; involved in the establishment of repressive chromatin structure through interactions with histones H3 and H4; appears to enhance expression of some genes	156	202	QASRPNLVGSQLPTTTLPVVSSNAQQQLPQQQLQQQQLQQQQPPPQ
	YCR093W Chr3 (280117..286443) [6327 bp; 2108 aa] {ON} CDC39Component of the CCR4-NOT complex; which has multiple roles in regulating mRNA levels including regulation of transcription and destabilizing mRNAs by deadenylation; basal transcription factor	1008	1058	QQQTEQQRQIILMQQHQQQMLIYQQRQQQQQQRQQQQQHHISANTIADQQ
	YCR093W Chr3 (280117..286443) [6327 bp; 2108 aa] {ON} CDC39Component of the CCR4-NOT complex; which has multiple roles in regulating mRNA levels including regulation of transcription and destabilizing mRNAs by deadenylation; basal transcription factor	1293	1395	QNVGLTQPQQQQAQMPTQILTSEQIRAQQQQQQLQKSRLNQPSQSAQPPGVNVPNPQGGIAAVQSDLEQNQRVLVHLMDILVSQIKENATKNNLAELGDQNQ
	YDL161W Chr4 (167714..169078) [1365 bp; 454 aa] {ON} ENT1Epsin-like protein involved in endocytosis and actin patch assembly and functionally redundant with Ent2p; binds clathrin via a clathrin-binding domain motif at C-terminus	189	349	QDEDYETALQLSKEEEELKRLQDLQRMQQQQGQQQLQQPMYYDIFGNPITPEEYAQFQLQQQQQQQQQQLQQQPMYYDVFGNPITPEELAQFQQQQQLQEQQYLASMQQQQQAMSNNPFAKSEQSSSSPKRNQLVAASSPQQLQQQKQQEPLIQNRTGNQ
	YDL160C Chr4 complement(170410..171930) [1521 bp; 506 aa] {ON} DHH1Cytoplasmic DExD/H-box helicase; stimulates mRNA decapping; coordinates distinct steps in mRNA function and decay; interacts with both the decapping and deadenylase complexes; may have a role in mRNA export and translation; C-terminus of Dhh1p interacts with Ngr1p and promotes POR1; but not EDC1 mRNA decay	433	505	QQSYHQQAIPQQQLPSQQQFAIPPQQHHPQFMVPPSHQQQQAYPPPQMPSQQGYPPQQEHFMAMPPGQSQPQ
	YDL106C Chr4 complement(270222..271901) [1680 bp; 559 aa] {ON} PHO2Homeobox transcription factor; regulatory targets include genes involved in phosphate metabolism; binds cooperatively with Pho4p to the PHO5 promoter; phosphorylation of Pho2p facilitates interaction with Pho4p	22	77	QHDQQQQQQQQHDQQHNQQQQPQPQPIQTQNLEHDHDQHTNDMSASSNASDSGPQ
	YDL088C Chr4 complement(298417..300003) [1587 bp; 528 aa] {ON} ASM4FG-nucleoporin component of central core of the nuclear pore complex (NPC); contributes directly to nucleocytoplasmic transport	18	49	QAPQTTQMFQSQSQLQPQPQPQPQQQQQHLQ
	YDL012C Chr4 complement(431108..431386;431473..431517) [324 bp; 107 aa] {ON} Tail-anchored plasma membrane protein containing a conserved CYSTM module; possibly involved in response to stress; may contribute to non-homologous end-joining (NHEJ) based on ydl012c htz1 double null phenotype	36	80	QSQQNYYPPQQQQQQYQQQPQYYQQQQPQYYQQHPQQPIYVQQQ
	YDR099W Chr4 (653607..654428) [822 bp; 273 aa] {ON} BMH214-3-3 protein; minor isoform; controls proteome at post-transcriptional level; binds proteins and DNA; involved in regulation of many processes including exocytosis; vesicle transport; Ras/MAPK signaling; and rapamycin-sensitive signaling	223	268	QLLRDNLTLWTSDISESGQEDQQQQQQQQQQQQQQQQQAPAEQTQ
	YDR145W Chr4 (746738..748357) [1620 bp; 539 aa] {ON} TAF12Subunit (61/68 kDa) of TFIID and SAGA complexes; involved in RNA polymerase II transcription initiation and in chromatin modification; similar to histone H2A	239	282	QESTQQQRVQQQRVQQQQQQQQQQQQQQQQQQQQQQQRQGQNQ
	YDR172W Chr4 (808324..810381) [2058 bp; 685 aa] {ON} SUP35Translation termination factor eRF3; has a role in mRNA deadenylation and decay; altered protein conformation creates the [PSI(+)] prion that alters translational fidelity and results in a nonsense suppressor phenotype	5	135	QGNNQQNYQQYSQNGNQQQGNNRYQGYQAYNAQAQPAGGYYQNYQGYSGYQQGGYQQYNPDAGYQQQYNPQGGYQQYNPQGGYQQQFNPQGGRGNYKNFNYNNNLQGYQAGFQPQSQGMSLNDFQKQQKQ
	YDR210W Chr4 (871074..871301) [228 bp; 75 aa] {ON} Predicted tail-anchored plasma membrane protein containing a conserved CYSTM module; related proteins in other organisms may be involved in response to stress; green fluorescent protein (GFP)-fusion protein localizes to the cell periphery	2	49	QQQGYYQQGPPQQGYYQQGPPQQGYYQQGPPQQGYPQQQPVYVQQGQ
	YDR213W Chr4 (889751..892492) [2742 bp; 913 aa] {ON} UPC2Sterol regulatory element binding protein; induces transcription of sterol biosynthetic genes and of DAN/TIR gene products; Ecm22p homolog; relocates from intracellular membranes to perinuclear foci on sterol depletion	284	397	QNYTQQQLQYQLHQQLQLQQHQQVQLQQYQQLRQEQHQQVQQQQQEQLQQYQQHFLQQQQQVLLQQEQQPNDEEGGVQEENSKKVKEGPLQSQTSETTLNSDAATLQADALSQ
	YDR228C Chr4 complement(921926..923806) [1881 bp; 626 aa] {ON} PCF11mRNA 3' end processing factor; essential component of cleavage and polyadenylation factor IA (CF IA); involved in pre-mRNA 3' end processing and in transcription termination; binds C-terminal domain of largest subunit of RNA pol II (Rpo21p); required for gene looping	175	303	QPNDEKLKMKLLVLSQLKQELKREKLTLNALKQVQMQLRQVFSQDQQVLQERMRYHELQQQQQQQQQQQQQQQQQQQQYHETKDMVGSYTQNSNSAIPLFGNNSDTTNQQNSLSSSLFGNISGVESFQ
	YDR293C Chr4 complement(1045640..1049392) [3753 bp; 1250 aa] {ON} SSD1Translational repressor with a role in polar growth and wall integrity; regulated by Cbk1p phosphorylation to effect bud-specific translational control and localization of specific mRNAs; interacts with TOR pathway components; contains a functional N-terminal nuclear localization sequence and nucleocytoplasmic shuttling appears…	12	81	QEPNNMFVQTTGGGKNAPKQIHVAHRRSQSELTNLMIEQFTLQKQLEQVQAQQQQLMAQQQQLAQQTGQ
	YDR359C Chr4 complement(1191936..1194884) [2949 bp; 982 aa] {ON} EAF1Component of the NuA4 histone acetyltransferase complex; acts as a platform for assembly of NuA4 subunits into the native complex; required for initiation of pre-meiotic DNA replication; likely due to its requirement for expression of IME1	907	952	QQQQLKQHQIQQQRQQLQEESSHVQQLQQLQPGSQAPPPKSSPSQ
	YDR443C Chr4 complement(1345676..1349938) [4263 bp; 1420 aa] {ON} SSN2Subunit of the RNA polymerase II mediator complex; associates with core polymerase subunits to form the RNA polymerase II holoenzyme; required for stable association of Srb10p-Srb11p kinase; essential for transcriptional regulation	1120	1136	QQQQMQQQQQQQQQQQ
	YDR486C Chr4 complement(1427431..1428120) [690 bp; 229 aa] {ON} VPS60Cytoplasmic and vacuolar membrane protein involved in late endosome to vacuole transport; required for normal filament maturation during pseudohyphal growth; may function in targeting cargo proteins for degradation; interacts with Vta1p	14	69	QLLQESNQSMNQAQQSLSNRISQLDTQIAQLNFQLQNIQKNLQRSNNKQPSLRKQ
	YEL036C Chr5 complement(83050..84552) [1503 bp; 500 aa] {ON} ANP1Subunit of the alpha-1;6 mannosyltransferase complex; type II membrane protein; has a role in retention of glycosyltransferases in the Golgi; involved in osmotic sensitivity and resistance to aminonitrophenyl propanediol	445	473	QQQQQQQQQQQQQQQQQQQQQQLDGNPQ
	YER018C Chr5 complement(191959..192624) [666 bp; 221 aa] {ON} SPC25Component of the evolutionarily conserved kinetochore-associated Ndc80 complex (Ndc80p-Nuf2p-Spc24p-Spc25p); involved in chromosome segregation; spindle checkpoint activity and kinetochore clustering	17	99	QKDVAQVLARQQNHARQQLQQFQAEMRQLHNQHQHLIDELQRLATQRTALQQQIHAAQQATNTTREQWRSYHERESELSRRQ
	YER109C Chr5 complement(375215..377614) [2400 bp; 799 aa] {ON} FLO8Transcription factor required for flocculation; diploid filamentous growth; and haploid invasive growth; genome reference strain S288C and most laboratory strains have a mutation in this gene	17	59	QPYMASQYKQDLQSNIAMATNSEQQRQQQQQQQQQQQQWINQ
	YFL024C Chr6 complement(87847..90345) [2499 bp; 832 aa] {ON} EPL1Subunit of NuA4; an essential histone H4/H2A acetyltransferase complex; conserved region at N-terminus is essential for interaction with the NPC (nucleosome core particle); homologous to Drosophila Enhancer of Polycomb	435	482	QLEDKSSRLTKQQQQQLLQQQQQQQQNALKTENGKQLANASSSSTSQ
	YFL024C Chr6 complement(87847..90345) [2499 bp; 832 aa] {ON} EPL1Subunit of NuA4; an essential histone H4/H2A acetyltransferase complex; conserved region at N-terminus is essential for interaction with the NPC (nucleosome core particle); homologous to Drosophila Enhancer of Polycomb	714	798	QNEYGIKFSDEPARLNQISNDTQVIRFGTMLGTKSYEQLREATIKYRRDYITRLKQKHIQHLQQQQQQQQQQQQQAQQQKQKSQ
	YFL010C Chr6 complement(115108..115743) [636 bp; 211 aa] {ON} WWM1WW domain containing protein of unknown function; binds to Mca1p; a caspase-related protease that regulates H2O2-induced apoptosis; overexpression causes G1 phase growth arrest and clonal death that is suppressed by overexpression of MCA1	63	123	QQADQAPPPYSSQSTPQVQAGAQAQQPRYYQPQQPQYPQYPQQQRYYPQQAPMPAAAPQQ
	YFR008W Chr6 (160535..161200) [666 bp; 221 aa] {ON} FAR7Protein involved in recovery from cell cycle arrest in response to pheromone; in a Far1p-independent pathway; interacts with Far3p; Far8p; Far9p; Far10p; and Far11p	3	50	QINVLSMQQQQQQQQQQQQVYMSPQAENLNHMYLLVNKLVKQLRENQ
	YGL237C Chr7 complement(52731..53528) [798 bp; 265 aa] {ON} HAP2Subunit of the heme-activated; glucose-repressed Hap2p/3p/4p/5p CCAAT-binding complex; a transcriptional activator and global regulator of respiratory gene expression; contains sequences sufficient for both complex assembly and DNA binding	119	167	QQQQQQQQQQQQQQLVVQAQYTQNQPNLQSDVLGTAIAEQPFYVNAKQ
	YGL192W Chr7 (142246..144048) [1803 bp; 600 aa] {ON} IME4Probable mRNA N6-adenosine methyltransferase required for entry into meiosis; transcribed in diploid cells; haploids repress IME4 transcription via production of antisense IME4 transcripts; antisense transcription is repressed in diploids	540	600	QPSKLQQQHQQQYWNNMDMGSGKYYAEAKQNPMNQKHTPFESKQQQKQQFQTLNNLYFAQ
	YGL181W Chr7 (157906..159096) [1191 bp; 396 aa] {ON} GTS1Protein involved in Arf3p regulation and in transcription regulation; localizes to the nucleus and to endocytic patches; contains an N-terminal Zn-finger and ArfGAP homology domain; a C-terminal glutamine-rich region; and a UBA (ubiquitin associated) domain; gts1 mutations affect budding; cell size; heat tolerance; sporulation; life span; u…	285	396	QAKPAVFDGTLQQYYDPATGMIYVDQQQYAMAMQQQQQQQQQLAVAQAQAQAQAQAQAQVQAQAQAQAQAQAQAQQIQMQQLQMQQQQQAPLSFQQMSQGGNLPQGYFYTQ
	YGL172W Chr7 (180700..182118) [1419 bp; 472 aa] {ON} NUP49FG-nucleoporin component of central core of the nuclear pore complex (NPC); contributes directly to nucleocytoplasmic transport and maintenance of the NPC permeability barrier; found in stable complex with Nic96p and two other FG-nucleoproteins (Nsp1p and Nup57p)	237	289	QQQQLQQQPQMQCALQNLSQLPITPMTRISELPPQIRQEIEQLDQYIQKQVQ
	YGL122C Chr7 complement(278946..280523) [1578 bp; 525 aa] {ON} NAB2Nuclear polyadenylated RNA-binding protein required for nuclear mRNA export and poly(A) tail length control; binds nuclear pore protein Mlp1p; autoregulates mRNA levels; related to human hnRNPs; nuclear localization sequence binds Kap104p	68	172	QTAFFALEALQQGESAENIVSKIRMMNAQSLGQSDIAQQQQQQQQQQQPDIAQQQPQQQPQQQPQQQPQQQPQQQPQQQPQQQPQQQPQLQPLQPQLGTQNAMQ
	YGL071W Chr7 (372012..374084) [2073 bp; 690 aa] {ON} AFT1Transcription factor involved in iron utilization and homeostasis; binds the consensus site PyPuCACCCPu and activates the expression of target genes in response to changes in iron availability; in iron-replete conditions activity is negatively regulated by Grx3p; Grx4p; and Fra2p; which regulate Aft1p translocation from the nucleus to the c…	590	657	QNGPHGSQHPIDFQHVDHRHLSSNEPQVRSHQYGPQQQPPQQLQYHQNQPHDGHNHEQHQTVQKDMQ
	YGL066W Chr7 (377609..379582) [1974 bp; 657 aa] {ON} SGF73SAGA complex subunit; has a role in anchoring the deubiquitination module into SAGA and SLIK complexes; involved in preinitiation complex assembly at promoters; human ortholog ataxin-7 is associated with spinocerebellar ataxia diseases; mutant displays reduced transcription elongation in the G-less-based run-on (GLRO) assay	434	493	QPINHLTNQNLNPKQIQRLQQQRALQAQLLSQQQQQQQQQQQHHSPQAQAQASTQQPTQ
	YGL066W Chr7 (377609..379582) [1974 bp; 657 aa] {ON} SGF73SAGA complex subunit; has a role in anchoring the deubiquitination module into SAGA and SLIK complexes; involved in preinitiation complex assembly at promoters; human ortholog ataxin-7 is associated with spinocerebellar ataxia diseases; mutant displays reduced transcription elongation in the G-less-based run-on (GLRO) assay	516	575	QIQQQQQQQQHKSQDTGLTPLEIQSQQQKLRQQQLQQQKFEAAASYLANATKLMQESNQ
	YGL035C Chr7 complement(431548..433062) [1515 bp; 504 aa] {ON} MIG1Transcription factor involved in glucose repression; sequence specific DNA binding protein containing two Cys2His2 zinc finger motifs; regulated by the SNF1 kinase and the GLC7 phosphatase	393	444	QNHLHFSSSSPDFQKELNNRLLNVQQQQQEQHTLLQSQNTSNQSQNQNQNQ
	YGR009C Chr7 complement(509047..511002) [1956 bp; 651 aa] {ON} SEC9t-SNARE protein important for fusion of secretory vesicles with the plasma membrane; similar to but not functionally redundant with Spo20p; SNAP-25 homolog	372	452	QQQQQQWFMDEQQQQQQHFNATNNQYGDQRGYKTFEEIQKEEEARQQQEEDEAVDEIKQEIKFTKQSSVASTRNTLKMAQ
	YGR083C Chr7 complement(644860..646815) [1956 bp; 651 aa] {ON} GCD2Delta subunit of the translation initiation factor eIF2B; the guanine-nucleotide exchange factor for eIF2; activity subsequently regulated by phosphorylated eIF2; first identified as a negative regulator of GCN4 expression	44	98	QEKAAKRAAMKQANGISIEQQQQQAQMKKEKKQLQREQQQKREQKQKNANKKKQ
	YGR136W Chr7 (762428..763153) [726 bp; 241 aa] {ON} LSB1Protein containing an N-terminal SH3 domain; binds Las17p; which is a homolog of human Wiskott-Aldrich Syndrome protein involved in actin patch assembly and actin polymerization	143	205	QYPSQQVSAPYAPPAGYMQAPPPQQQQAPLPYPPPFTNYYQQPQQQYAPPSQQAPVEAQPQQ
	YGR241C Chr7 complement(974875..976581) [1707 bp; 568 aa] {ON} YAP1802Protein involved in clathrin cage assembly; binds Pan1p and clathrin; homologous to Yap1801p; member of the AP180 protein family	305	400	QKKLEQIREQKRLLEQQLQNQQLLISPTVPQDAYNPFGSQQQDLNNDTFSFEPTQPQMTAQVPQPTANPFLIPQQQQQALQLTSASTMPQPSEIQ
	YGR241C Chr7 complement(974875..976581) [1707 bp; 568 aa] {ON} YAP1802Protein involved in clathrin cage assembly; binds Pan1p and clathrin; homologous to Yap1801p; member of the AP180 protein family	463	560	QQQQNFQNSPNPFTLQQAQTTPILAHSQTGNPFQAQNVVTSPMGTYMTNPVAGQLQYASTGAQQQPQMMQGQQTGYVMVPTAFVPINQQQQQQQHQQ
	YHL025W Chr8 (54851..55849) [999 bp; 332 aa] {ON} SNF6Subunit of the SWI/SNF chromatin remodeling complex involved in transcriptional regulation; functions interdependently in transcriptional activation with Snf2p and Snf5p	238	284	QYHEAKERIRQKEVTAGEAQDEASLQQQQQQDLQQQQQVVTTVASQ
	YHL020C Chr8 complement(66242..67456) [1215 bp; 404 aa] {ON} OPI1Transcriptional regulator of a variety of genes; phosphorylation by protein kinase A stimulates Opi1p function in negative regulation of phospholipid biosynthetic genes; involved in telomere maintenance	281	310	QKVEQQQQQQQQQQQQQLLQQQLLQQQQQ
	YHR030C Chr8 complement(168890..170344) [1455 bp; 484 aa] {ON} SLT2Serine/threonine MAP kinase; involved in regulating maintenance of cell wall integrity; progression through the cell cycle; and nuclear mRNA retention in heat shock; required for mitophagy and pexophagy; affects recruitment of mitochondria to the phagophore assembly site (PAS); regulated by the PKC1-mediated signaling pathway	348	391	QMVIQEVQDFRLFVRQPLLEEQRQLQLQQQQQQQQQQQQQQQQ
	YHR135C Chr8 complement(372694..374310) [1617 bp; 538 aa] {ON} YCK1Palmitoylated plasma membrane-bound casein kinase I isoform; shares redundant functions with Yck2p in morphogenesis; proper septin assembly; endocytic trafficking; provides an essential function overlapping with that of Yck2p	390	533	QLQMQQLQMQQLQQQQQQQQYAQKTEADMRNSQYKPKLDPTSYEAYQHQTQQKYLQEQQKRQQQQKLQEQQLQEQQLQQQQQQQQQLRATGQPPSQPQAQTQSQQFGARYQPQQQPSAALRTPEQHPNDDNSSLAASHKGFFQ
	YHR149C Chr8 complement(394455..396659) [2205 bp; 734 aa] {ON} SKG6Integral membrane protein that localizes primarily to growing sites such as the bud tip or the cell periphery; potential Cdc28p substrate; Skg6p interacts with Zds1p and Zds2p	485	564	QPLNYQDQYQQQEQSPVYNGHTQYPGNGYSGNPQQQGYTAQFVQNPQWYGVPTPQQQQHNHPQTLETIGELPTPAYLAQ
	YHR161C Chr8 complement(420373..422286) [1914 bp; 637 aa] {ON} YAP1801Protein involved in clathrin cage assembly; binds Pan1p and clathrin; homologous to Yap1802p; member of the AP180 protein family	489	579	QNTNMPLQQQIISNPFQNQTYNQQQFQQQKMPLSSINSVMTTPTSMQGSMNIPQRFDKMEFQAHYTQNHLQQQQQQQQQQQQQQQQQPQQ
	YHR186C Chr8 complement(475999..480672) [4674 bp; 1557 aa] {ON} KOG1Subunit of TORC1; a rapamycin-sensitive complex involved in growth control that contains Tor1p or Tor2p; Lst8p and Tco89p; contains four HEAT repeats and seven WD-40 repeats; may act as a scaffold protein to couple TOR and its effectors	501	532	QSRKSISLQSSQQQLQQQQQQQQQFTGFFEQ
	YHR186C Chr8 complement(475999..480672) [4674 bp; 1557 aa] {ON} KOG1Subunit of TORC1; a rapamycin-sensitive complex involved in growth control that contains Tor1p or Tor2p; Lst8p and Tco89p; contains four HEAT repeats and seven WD-40 repeats; may act as a scaffold protein to couple TOR and its effectors	812	889	QDAEVILRLQQEFEEQYQQLHSQLQHLQNQSHLQQQQSQQQQQHLEQQQMKIEKQIRHCQVMQNQLEVIDLRKLKRQ
	YIL109C Chr9 complement(157385..160165) [2781 bp; 926 aa] {ON} SEC24Component of the Sec23p-Sec24p heterodimer of the COPII vesicle coat; required for cargo selection during vesicle formation in ER to Golgi transport; homologous to Sfb2p and Sfb3p	10	75	QAQLQYGQNATPLQQPAQFMPPQDPAAAGMSYGQMGMPPQGAVPSMGQQQFLTPAQEQLHQQIDQ
	YIL105C Chr9 complement(167581..169641) [2061 bp; 686 aa] {ON} SLM1Phosphoinositide PI4;5P(2) binding protein; forms a complex with Slm2p; acts downstream of Mss4p in a pathway regulating actin cytoskeleton organization in response to stress; phosphorylated by the TORC2 complex	16	109	QQQLNLQHLHNLQQHTRSMTSADHANVLQQQQQQQQQQQQQQQQQQQSASFQNGSLTSDINQQSYLNGQPVPSTSNSTFQNNRTLTMNSGGLQ
	YIR006C Chr9 complement(365466..369908) [4443 bp; 1480 aa] {ON} PAN1Part of actin cytoskeleton-regulatory complex Pan1p-Sla1p-End3p; associates with actin patches on the cell cortex; promotes protein-protein interactions essential for endocytosis; binds to and activates the Arp2/3 complex in vitro; previously thought to be a subunit of poly(A) ribonuclease	5	78	QQQGMGYQQQQQQQQQQPNGFYPQQQQGQSSNQPQGQPQPQQQMAFNQPQATGIGGMPQSFGNSFSSMPQQPQ
	YIR006C Chr9 complement(365466..369908) [4443 bp; 1480 aa] {ON} PAN1Part of actin cytoskeleton-regulatory complex Pan1p-Sla1p-End3p; associates with actin patches on the cell cortex; promotes protein-protein interactions essential for endocytosis; binds to and activates the Arp2/3 complex in vitro; previously thought to be a subunit of poly(A) ribonuclease	135	230	QQPQLQSIQPQGTGYYQAANTANVHSVQPLQSQGTGYYVSTPNLISSNQTQQPLQAQGTGYYQSQPQQVPPPQQAQSLQPLKPQQTGFYLQPQNQ
	YIR023W Chr9 (399777..402689) [2913 bp; 970 aa] {ON} DAL81Positive regulator of genes in multiple nitrogen degradation pathways; contains DNA binding domain but does not appear to bind the dodecanucleotide sequence present in the promoter region of many genes involved in allantoin catabolism	55	104	QHLANDHPNILREKGGSQQQQHQQQQQQQQQQQQQQQQQSLDTLLHHYQ
	YJL141C Chr10 complement(147967..150390) [2424 bp; 807 aa] {ON} YAK1Serine-threonine protein kinase; component of a glucose-sensing system that inhibits growth in response to glucose availability; upon nutrient deprivation Yak1p phosphorylates Pop2p to regulate mRNA deadenylation; the co-repressor Crf1p to inhibit transcription of ribosomal genes; and the stress-responsive transcription factors H…	55	109	QGSQRSPQQQHQNHHQQQQQQQQQQQQNSQFCFVNPWNEEKVTNSQQNLVYPPQ
	YJL073W Chr10 (303181..305118) [1938 bp; 645 aa] {ON} JEM1DnaJ-like chaperone required for nuclear membrane fusion during mating; localizes to the ER membrane; exhibits genetic interactions with KAR2	492	525	QKQLQTYKEHKHRNFNQQYFQQQQQQQQHQRHQ
	YJL019W Chr10 (402897..404945) [2049 bp; 682 aa] {ON} MPS3Nuclear envelope protein required for SPB duplication and nuclear fusion; localizes to the SPB half bridge and at telomeres during meiosis; required with Ndj1p and Csm4p for meiotic bouquet formation and telomere-led rapid prophase movement	357	429	QYIDKDYFIQEMNRRLQSNKQEIWEEITNRLETQQQQQQQQVQQDYSNVPQQYSSILMKRLIHQIYNSNQHQ
	YJR091C Chr10 complement(595061..598336) [3276 bp; 1091 aa] {ON} JSN1Member of the Puf family of RNA-binding proteins; interacts with mRNAs encoding membrane-associated proteins; involved in localizing the Arp2/3 complex to mitochondria; overexpression causes increased sensitivity to benomyl	430	490	QQPPQFLLNSQGLPLGLENNNLQPQPLLQEQLFNGAVTFQQQGNVSIPVFNQQSQQSQHQ
	YKL088W Chr11 (275283..276998) [1716 bp; 571 aa] {ON} CAB3Subunit of a phosphopantothenoylcysteine decarboxylase (PPCDC; Cab3p; Sis2p; Vhs3p) complex; which catalyzes the third step of coenzyme A biosynthesis; null mutant lethality is complemented by E. coli coaBC	146	197	QQQQQEQLQQNQQQEEQQKAQLQEQNQRAKQQEEVKQIQEQVQKKQTERQQ
	YKL068W Chr11 (310199..313078) [2880 bp; 959 aa] {ON} NUP100FG-nucleoporin component of central core of the nuclear pore complex (NPC); contributes directly to nucleocytoplasmic transport and maintenance of the NPC permeability barrier and is involved in gene tethering at the nuclear periphery; homologous to Nup116p	336	390	QNNQQQGSGLFGQNSQTSGSSGLFGQNNQKQPNTFTQSNTGIGLFGQNNNQQQQ
	YKL054C Chr11 complement(336537..338753) [2217 bp; 738 aa] {ON} DEF1RNAPII degradation factor; forms a complex with Rad26p in chromatin; enables ubiquitination and proteolysis of RNAPII present in an elongation complex; mutant is deficient in Zip1p loading onto chromosomes during meiosis	375	561	QANTVPQPQQQSQQPQQPQQPQQPQQPQQPQQQQQPQQPQQPQQQLQQQQQQQQQPVQAQAQAQEEQLSQNYYTQQQQQQYAQQQHQLQQQYLSQQQQYAQQQQQHPQPQSQQPQSQQSPQSQKQGNNVAAQQYYMYQNQFPGYSYPGMFDSQGYAYGQQYQQLAQNNAQTSGNANQYNFQQGYGQ
	YKL054C Chr11 complement(336537..338753) [2217 bp; 738 aa] {ON} DEF1RNAPII degradation factor; forms a complex with Rad26p in chromatin; enables ubiquitination and proteolysis of RNAPII present in an elongation complex; mutant is deficient in Zip1p loading onto chromosomes during meiosis	587	718	QPQQQQPYGGSFMPYYAHFYQQSFPYGQPQYGVAGQYPYQLPKNNYNYYQTQNGQEQQSPNQGVAQHSEDSQQKQSQQQQQQQPQGQPQPEVQMQNGQPVNPQQQMQFQQYYQFQQQQQQAAAAAAAAAQQ
	YKL038W Chr11 (365605..369117) [3513 bp; 1170 aa] {ON} RGT1Glucose-responsive transcription factor that regulates expression of several glucose transporter (HXT) genes in response to glucose; binds to promoters and acts both as a transcriptional activator and repressor	300	357	QPQLPPPQQQSQPQAHQQKLQQGQNLYSYSQFSQQQPYNPSISSFGQFAANGFHSRQ
	YKL032C Chr11 complement(380065..381858) [1794 bp; 597 aa] {ON} IXR1Protein that binds DNA containing intrastrand cross-links formed by cisplatin; contains two HMG (high mobility group box) domains; which confer the ability to bend cisplatin-modified DNA; mediates aerobic transcriptional repression of COX5b	8	118	QDDASNSNLLNIGQDHSLQYQGLEHNDSQYRDASHQTPHQYLNQFQAQPQQQQQQQQQQQQQQQQAPYQGHFQQSPQQQQQNVYYPLPPQSLTQPTSQSQQQQQQQQQQQ
	YKL032C Chr11 complement(380065..381858) [1794 bp; 597 aa] {ON} IXR1Protein that binds DNA containing intrastrand cross-links formed by cisplatin; contains two HMG (high mobility group box) domains; which confer the ability to bend cisplatin-modified DNA; mediates aerobic transcriptional repression of COX5b	280	359	QPQLTHHQQQMQQQLQLQQQQQLQQQQQLQQQHQLQQQQQLQQQHHHLQQQQQQQQHPVVKKLSSTQSRIERRKQLKKQ
	YLL013C Chr12 complement(122075..124714) [2640 bp; 879 aa] {ON} PUF3Protein of the mitochondrial outer surface; links the Arp2/3 complex with the mitochore during anterograde mitochondrial movement; also binds to and promotes degradation of mRNAs for select nuclear-encoded mitochondrial proteins	397	418	QQQQQQQQQQQQEDQQQQQQQ
	YLL010C Chr12 complement(129330..130613) [1284 bp; 427 aa] {ON} PSR1Plasma membrane associated protein phosphatase involved in the general stress response; required along with binding partner Whi2p for full activation of STRE-mediated gene expression; possibly through dephosphorylation of Msn2p	139	209	QEKGDAVKDTSRQKKQQQQQQQQSQPQPQPQSQSQSQSQSQSQQRGPTVQVSSDHLIQDMNLSRVSSSSQ
	YLR095C Chr12 complement(329677..332115) [2439 bp; 812 aa] {ON} IOC2Member of a complex (Isw1b) with Isw1p and Ioc4p that exhibits nucleosome-stimulated ATPase activity and acts within coding regions to coordinate transcription elongation with termination and processing; contains a PHD finger motif	760	807	QQTGSKTVPQAPQAPQTSQASIQPQQQQQQQQQQQPLHPKEQNFHFQ
	YLR177W Chr12 (511054..512940) [1887 bp; 628 aa] {ON} Putative protein of unknown function; phosphorylated by Dbf2p-Mob1p in vitro; some strains contain microsatellite polymophisms at this locus; YLR177W is not an essential gene	148	169	QKYYPQKQQQQQQQQQQQQQQ
	YLR187W Chr12 (524865..527945) [3081 bp; 1026 aa] {ON} SKG3Protein of unknown function; green fluorescent protein (GFP)-fusion protein localizes to the cell periphery; cytoplasm; bud; and bud neck; potential Cdc28p substrate; similar to Caf120p and Skg4p	903	962	QPMQQGGNSSMYSFQSSQHRFHSSQQRQNQSLSFRNNTYGSGNNQNTFHPSPQLQQQPQ
	YLR206W Chr12 (554578..556419) [1842 bp; 613 aa] {ON} ENT2Epsin-like protein required for endocytosis and actin patch assembly and functionally redundant with Ent1p; contains clathrin-binding motif at C-terminus	162	433	QRTRSNPHDSSPSYQDDLEKALEESRITAQEDEQRRRELAQYDDEDPDFQAALQLSKEEEELKQLQELQRLQKQQQSLSQFQAPLQQQQPQQQPAYYDIFGNPISQDEYLQYQYQQDQEQAMAQQRWLDQQQEQQQLAEQQYFQQQQQAAAAASALQQQQTAANMQQQQQQPADFQQPLPTGSNNPFSMDNLERQKQEQQHAQLQRQQEEARQQQEQLKLQQLQRQQQEEAQLHQKRQEEAQLQQQQAQLLQQQAQFQQQQPLKQTRTGNQ
	YLR206W Chr12 (554578..556419) [1842 bp; 613 aa] {ON} ENT2Epsin-like protein required for endocytosis and actin patch assembly and functionally redundant with Ent1p; contains clathrin-binding motif at C-terminus	465	606	QHTKTGTFINSQGTGYKQVTNEPKNNPFLSNQYTGLPSTNIVPTQTGYGFGNQPQSPPTNSPQQNPTGISYSQPQQQQQPQQQPQYMQNFQQQQPQYAQNFQQQPQYTQNYQQQPQYIQPHQQQQQQQQQQQQQQGYTPDQ
	YLR228C Chr12 complement(600019..602463) [2445 bp; 814 aa] {ON} ECM22Sterol regulatory element binding protein; regulates transcription of sterol biosynthetic genes; contains Zn[2]-Cys[6] binuclear cluster; homologous to Upc2p; relocates from intracellular membranes to perinuclear foci on sterol depletion	109	145	QQQQQQLHHQQEQQFRQQQQVQLQQQLLPHVGTDEQ
	YLR357W Chr12 (841331..844000) [2670 bp; 889 aa] {ON} RSC2Component of the RSC chromatin remodeling complex; required for expression of mid-late sporulation-specific genes; involved in telomere maintenance	666	732	QNAIGQQQIPLSRVGSPGAGGPLTVQGLKQHQLQRLQQQQHQYQQQKRSQASRYNIPTIIDDLTSQ
	YLR437C Chr12 complement(1011622..1012023) [402 bp; 133 aa] {ON} DIF1Protein that regulates the nuclear localization of ribonucleotide reductase Rnr2p and Rnr4p subunits; phosphorylated by Dun1p in response to DNA damage and degraded; N-terminal half has similarity to S. pombe Spd1 protein	3	81	QLEWASSLVPKRQLQQQQQQQEQQQQQQQDFHKDQLMTVGMRIRQRVDQGYASRTPSTSDASLQPGVIRDYSSVIVPQ
	YML113W Chr13 (44045..44791) [747 bp; 248 aa] {ON} DAT1DNA binding protein that recognizes oligo(dA).oligo(dT) tracts; Arg side chain in its N-terminal pentad Gly-Arg-Lys-Pro-Gly repeat is required for DNA-binding; not essential for viability	105	127	QSFMDQQQQQQQQQQQQLLQQQ
	YMR016C Chr13 complement(303236..305593) [2358 bp; 785 aa] {ON} SOK2Nuclear protein that plays a regulatory role in the cyclic AMP (cAMP)-dependent protein kinase (PKA) signal transduction pathway; negatively regulates pseudohyphal differentiation; homologous to several transcription factors	18	98	QESNMSAVSNSESTIGQSTQQQQQQQQYLGQSVQPLMPVSYQYVVPEQWPYPQYYQQPQSQSQQQLQSQPQMYQVQESFQ
	YMR043W Chr13 (353871..354731) [861 bp; 286 aa] {ON} MCM1Transcription factor involved in cell-type-specific transcription and pheromone response; plays a central role in the formation of both repressor and activator complexes	121	285	QRQQPQQQQPQQQQQVLNAHANSLGHLNQDQVPAGALKQEVKSQLLGGANPNQNSMIQQQQHHTQNSQPQQQQQQQPQQQMSQQQMSQHPRPQQGIPHPQQSQPQQQQQQQQQLQQQQQQQQQQPLTGIHQPHQQAFANAASPYLNAEQNAAYQQYFQEPQQGQ
	YMR047C Chr13 complement(363364..366705) [3342 bp; 1113 aa] {ON} NUP116FG-nucleoporin component of central core of the nuclear pore complex (NPC); contributes directly to nucleocytoplasmic transport and maintenance of the NPC permeability barrier; forms a stable association with Nup82p; Gle2p and two other FG-nucleoporins (Nsp1p and Nup159p)	385	520	QTNQQQSGGGLFGQQQNSNAGGLFGQNNQSQNQSGLFGQQNSSNAFGQPQQQGGLFGSKPAGGLFGQQQGASTFASGNAQNNSIFGQNNQQQQSTGGLFGQQNNQSQSQPGGLFGQTNQNNNQPFGQNGLQQPQQ
	YMR047C Chr13 complement(363364..366705) [3342 bp; 1113 aa] {ON} NUP116FG-nucleoporin component of central core of the nuclear pore complex (NPC); contributes directly to nucleocytoplasmic transport and maintenance of the NPC permeability barrier; forms a stable association with Nup82p; Gle2p and two other FG-nucleoporins (Nsp1p and Nup159p)	691	740	QSTNAGGLFQNNTSTNTSGGGLFSQPSQSMAQSQNALQQQQQQQRLQIQ
	YMR070W Chr13 (409154..410626) [1473 bp; 490 aa] {ON} MOT3Transcriptional repressor and activator with two C2-H2 zinc fingers; involved in repression of a subset of hypoxic genes by Rox1p; repression of several DAN/TIR genes during aerobic growth; and repression of ergosterol biosynthetic genes in response to hyperosmotic stress; contributes to recruitment of the Tup1p-Cyc8p general repressor to …	7	56	QQQQQQRQQHQQQQHQQQQHQHQHQQQQHTILQNVSNTNNIGSDSLASQ
	YMR124W Chr13 (514456..517287) [2832 bp; 943 aa] {ON} Protein of unknown function; GFP-fusion protein localizes to the cell periphery; cytoplasm; bud; and bud neck; interacts with Crm1p in two-hybrid assay; YMR124W is not an essential gene; predicted to have a role in organelle organization	52	117	QPSSVPQQQQQQQQYYRNGMNEAPIQAPLQQRQIPMQNYSQQQRQQQQYNFEYSNPHMNEIPLMQ
	YMR124W Chr13 (514456..517287) [2832 bp; 943 aa] {ON} Protein of unknown function; GFP-fusion protein localizes to the cell periphery; cytoplasm; bud; and bud neck; interacts with Crm1p in two-hybrid assay; YMR124W is not an essential gene; predicted to have a role in organelle organization	304	401	QFRQPQQQRMLPMNNYNNHPGQFQNTPPVMPSGQQPPQQPRTLSLTNGPRYSPQNPRPFAGHQQISQRQQQQQQQLQLHPMSEGYRTMSLQSQNVPQ
	YMR160W Chr13 (575066..577516) [2451 bp; 816 aa] {ON} Putative protein of unknown function; green fluorescent protein (GFP)-fusion protein localizes to the membrane of the vacuole; mutant has enhanced sensitivity to overexpression of mutant huntingtin; YMR160W is not an essential gene	4	37	QQKQDKQLQHQTQEQQQIREDQQEVPPQRPRQQ
	YMR164C Chr13 complement(587274..589550) [2277 bp; 758 aa] {ON} MSS11Transcription factor involved in regulation of invasive growth and starch degradation; controls the activation of MUC1 and STA2 in response to nutritional signals	235	338	QNSANFAPDTAINSDIAGQQYATINLHKHFNDLQSPAQPQQSSQQQIQQPQHQPQHQPQQQQQQQQQQQQQQQQQQQQQQQQQQQQQQHQQQQQTPYPIVNPQ
	YMR164C Chr13 complement(587274..589550) [2277 bp; 758 aa] {ON} MSS11Transcription factor involved in regulation of invasive growth and starch degradation; controls the activation of MUC1 and STA2 in response to nutritional signals	361	433	QQFNAQTQSSMFSDQQRFFQYQLHHQNQGQAPSFQQSQSGRFDDMNAMKMFFQQQALQQNSLQQNLGNQNYQ
	YNL298W Chr14 (68915..71443) [2529 bp; 842 aa] {ON} CLA4Cdc42p-activated signal transducing kinase of the PAK (p21-activated kinase) family; along with Ste20p and Skm1p; involved in septin ring assembly; vacuole inheritance; cytokinesis; sterol uptake regulation; phosphorylates Cdc3p and Cdc10p	327	393	QSNIPRHLQNVPNQQYPKMRNGHSPTNGQFPRGPMHPNNSQRSLQQQQQQQQQQKQQHQQYPYHHQ
	YNL251C Chr14 complement(172588..174315) [1728 bp; 575 aa] {ON} NRD1RNA-binding protein; subunit of Nrd1 complex (Nrd1p-Nab3p-Sen1p); complex interacts with the exosome to mediate 3&#8242; end formation of some mRNAs; snRNAs; snoRNAs; and CUTs; interacts with the C-terminal domain of the RNA polymerase II large subunit (Rpo21p); preferentially at phosphorylated Ser5; to direct transcription termi…	515	574	QQYVQPMMQQPYGYAPNQPLPSQGPAAAAPPVPQQQFDPTAQLNSLMNMLNQQQQQQQQ
	YNL243W Chr14 (188051..190957) [2907 bp; 968 aa] {ON} SLA2Transmembrane actin-binding protein involved in membrane cytoskeleton assembly and cell polarization; adaptor protein that links actin to clathrin and endocytosis; present in the actin cortical patch of the emerging bud tip; dimer in vivo	349	529	QATAQMQPDFWANQQAQFANEQNRLEQERVQQLQQQQAQQELFQQQLQKAQQDMMNMQLQQQNQHQNDLIALTNQYEKDQALLQQYDQRVQQLESEITTMDSTASKQLANKDEQLTALQDQLDVWERKYESLAKLYSQLRQEHLNLLPRFKKLQLKVNSAQESIQKKEQLEHKLKQKDLQ
	YNL197C Chr14 complement(267608..269593) [1986 bp; 661 aa] {ON} WHI3RNA binding protein that sequesters CLN3 mRNA in cytoplasmic foci; cytoplasmic retention factor for Cdc28p and associated cyclins; regulates cell fate and dose-dependently regulates the critical cell size required for passage through Start	228	309	QRSRFSFSDPFSNDSPLSQQQSQQQQQQPQQPQQHSTQKHSPQQCNQQQVNSSIPLSSQGQVIGLHSNHSHQDLSVESTIQ
	YNL161W Chr14 (332597..334867) [2271 bp; 756 aa] {ON} CBK1Serine/threonine protein kinase of the the RAM signaling network; Ndr/LATS family member; binds regulatory subunit Mob2p; involved in regulation of cellular morphogenesis; polarized growth; and septum destruction; phosphorylation by Cbk1p regulates localization and activity of Ace2p transcription factor and Ssd1p translational repressor; C…	22	72	QQQDQQHQQQQQYANEMNPYQQIPRPPAAGFSSNYMKEQGSHQSLQEHLQ
	YNL161W Chr14 (332597..334867) [2271 bp; 756 aa] {ON} CBK1Serine/threonine protein kinase of the the RAM signaling network; Ndr/LATS family member; binds regulatory subunit Mob2p; involved in regulation of cellular morphogenesis; polarized growth; and septum destruction; phosphorylation by Cbk1p regulates localization and activity of Ace2p transcription factor and Ssd1p translational repressor; C…	188	254	QRLQQEQENVQVQQQLSQAQQQNSRQQQQQLQYQQQQQQQQQQQHMQIQQQQQQQQQQQQSQSPVQ
	YNL154C Chr14 complement(343636..345276) [1641 bp; 546 aa] {ON} YCK2Palmitoylated plasma membrane-bound casein kinase I isoform; shares redundant functions with Yck1p in morphogenesis; proper septin assembly; endocytic trafficking; provides an essential function overlapping with that of Yck1p	399	451	QYSSPDHHHHYNQQQQQQQAQAQAQAQAQAKVQQQQLQQAQAQQQANRYQLQ
	YNL154C Chr14 complement(343636..345276) [1641 bp; 546 aa] {ON} YCK2Palmitoylated plasma membrane-bound casein kinase I isoform; shares redundant functions with Yck1p in morphogenesis; proper septin assembly; endocytic trafficking; provides an essential function overlapping with that of Yck1p	474	528	QQQTQQKYAQQQQKQMQQKSKQFANTGANGQTNKYPYNAQPTANDEQNAKNAAQ
	YNL124W Chr14 (392892..394370) [1479 bp; 492 aa] {ON} NAF1RNA-binding protein required for the assembly of box H/ACA snoRNPs and thus for pre-rRNA processing; forms a complex with Shq1p and interacts with H/ACA snoRNP components Nhp2p and Cbf5p; similar to Gar1p	418	488	QQSFMPMTQSQPPLPYGVPPMNQMQNPMYIQPPPQAPPQGNGNFQQVMELHQILLQQQQQQHQYQHQHQQ
	YNL027W Chr14 (579580..581616) [2037 bp; 678 aa] {ON} CRZ1Transcription factor that activates transcription of genes involved in stress response; nuclear localization is positively regulated by calcineurin-mediated dephosphorylation	105	172	QSLYKPDLPQQQLQQQQLQQQQQQQQQQQQQQQKQTPTLKVEQSDTFQWDDILTPADNQHRPSLTNQ
	YNL016W Chr14 (602907..604268) [1362 bp; 453 aa] {ON} PUB1Poly (A)+ RNA-binding protein; abundant mRNP-component protein that binds mRNA and is required for stability of many mRNAs; component of glucose deprivation induced stress granules; involved in P-body-dependent granule assembly	387	453	QAAVCIVALANFPFQGRNLRTGWGKERSNFMPQQQQQGGQPLIMNDQQQPVMSEQQQQQQQQQQQQ
	YNR006W Chr14 (636986..638854) [1869 bp; 622 aa] {ON} VPS27Endosomal protein that forms a complex with Hse1p; required for recycling Golgi proteins; forming lumenal membranes and sorting ubiquitinated proteins destined for degradation; has Ubiquitin Interaction Motifs which bind ubiquitin (Ubi4p)	429	488	QQLQSINLSQQYTLPQVPSDPYNYLTENVQNPAESYQTPPLQQLSSHQYKPQQDVSRQQ
	YNR052C Chr14 complement(719346..720647) [1302 bp; 433 aa] {ON} POP2RNase of the DEDD superfamily; subunit of the Ccr4-Not complex that mediates 3' to 5' mRNA deadenylation	1	91	QSMNVQPRVLAVGGEQFFSQRQASEQHQQQNMGPQVYSPKVNRARMFPQGMPVNTINGSVNQEMNNAYLLKQKNEPLLTQQQQQQQQQQQ
	YNR052C Chr14 complement(719346..720647) [1302 bp; 433 aa] {ON} POP2RNase of the DEDD superfamily; subunit of the Ccr4-Not complex that mediates 3' to 5' mRNA deadenylation	111	145	QQQQQQQQQQQQQQQGVGLNRPLASQLPKHLTNQ
	YOL148C Chr15 complement(45760..47574) [1815 bp; 604 aa] {ON} SPT20Subunit of the SAGA transcriptional regulatory complex; involved in maintaining the integrity of the complex; mutant displays reduced transcription elongation in the G-less-based run-on (GLRO) assay	68	104	QIQQLQQRQRLLLQQRLLEQQRKQQALQNYEAQFYQ
	YOL123W Chr15 (87844..89448) [1605 bp; 534 aa] {ON} HRP1Subunit of cleavage factor I; a five-subunit complex required for the cleavage and polyadenylation of pre-mRNA 3' ends; RRM-containing heteronuclear RNA binding protein and hnRNPA/B family member that binds to poly (A) signal sequences	348	405	QGDFNQMYQNPMMGGYNPMMNPQAMTDYYQKMQEYYQQMQKQTGMDYTQMYQQQMQQ
	YOL051W Chr15 (234940..238185) [3246 bp; 1081 aa] {ON} GAL11Subunit of the RNA polymerase II mediator complex; associates with core polymerase subunits to form the RNA polymerase II holoenzyme; affects transcription by acting as target of activators and repressors; forms part of the tail domain of mediator	126	350	QMFLNQQAQARQQVAQQLRNQQQQQQQQQQQQRRQLTPQQQQLVNQMKVAPIPKQLLQRIPNIPPNINTWQQVTALAQQKLLTPQDMEAAKEVYKIHQQLLFKARLQQQQAQAQAQANNNNNGLPQNGNINNNINIPQQQQMQPPNSSANNNPLQQQSSQNTVPNVLNQINQIFSPEEQRSLLQEAIETCKNFEKTQLGSTMTEPVKQSFIRKYINQKALRKIQ
	YOL051W Chr15 (234940..238185) [3246 bp; 1081 aa] {ON} GAL11Subunit of the RNA polymerase II mediator complex; associates with core polymerase subunits to form the RNA polymerase II holoenzyme; affects transcription by acting as target of activators and repressors; forms part of the tail domain of mediator	405	497	QQQNASSKLYQMQQQQQAQAQAQAQAQAQAQAQAQAQAAQAAQAQAQAQAQAQAQAQAQAQAQAQAQAQAQAQAQAHAQHQPSQQPQQAQQQ
	YOL051W Chr15 (234940..238185) [3246 bp; 1081 aa] {ON} GAL11Subunit of the RNA polymerase II mediator complex; associates with core polymerase subunits to form the RNA polymerase II holoenzyme; affects transcription by acting as target of activators and repressors; forms part of the tail domain of mediator	654	696	QQNMQQSLQQMQHLQQLKMQQQQQQQQQQQQQQQQQQQQQQQ
	YOL004W Chr15 (316938..321548) [4611 bp; 1536 aa] {ON} SIN3Component of the Sin3p-Rpd3p histone deacetylase complex; involved in transcriptional repression and activation of diverse processes; including mating-type switching and meiosis; involved in the maintenance of chromosomal integrity	479	519	QQVQHAQQHAQQQHEAQMHAQAQAQAQAQAQVEQQKQQQQ
	YOR066W Chr15 (449436..451325) [1890 bp; 629 aa] {ON} MSA1Activator of G1-specific transcription factors; MBF and SBF; involved in regulation of the timing of G1-specific gene transcription and cell cycle initiation; localization is cell-cycle dependent and regulated by Cdc28p phosphorylation	445	498	QLQAQLEAQVQVQSQSNSPTQRQQQQRQFQIPPPHINMNSSPPQINIASPPHQ
	YOR106W Chr15 (519121..519972) [852 bp; 283 aa] {ON} VAM3Syntaxin-like vacuolar t-SNARE that functions with Vam7p in vacuolar protein trafficking; mediates docking/fusion of late transport intermediates with the vacuole; has an acidic di-leucine sorting signal and C-terminal transmembrane region	141	208	QDPESSYISIKVNEQSPLLHNEGQHQLQLQEEQEQQQQGLSQEELDFQTIIHQERSQQIGRIHTAVQ
	YOR113W Chr15 (534075..536819) [2745 bp; 914 aa] {ON} AZF1Zinc-finger transcription factor; involved in induction of CLN3 transcription in response to glucose; genetic and physical interactions indicate a possible role in mitochondrial transcription or genome maintenance	6	57	QFMGPTQAGQNESQNQSSGEAGEQNQEHGQGPTPILNQSQPASSQPQHQQQ
	YOR113W Chr15 (534075..536819) [2745 bp; 914 aa] {ON} AZF1Zinc-finger transcription factor; involved in induction of CLN3 transcription in response to glucose; genetic and physical interactions indicate a possible role in mitochondrial transcription or genome maintenance	115	188	QPPDLSQIGRGFSIVNNLFPQQQQLQNQHRQQQQQQQQQSHQQPPFKTPSFSTGLTGSSSQYQFLPRNDNTSQ
	YOR197W Chr15 (717086..718384) [1299 bp; 432 aa] {ON} MCA1Ca2+-activated cysteine protease; may cleave specific substrates during stress response; involved in regulation of apoptosis upon H2O2 treatment; contributes to clearance of insoluble protein aggregates during normal growth; may be involved in cell cycle progression; similar to mammalian caspases; but exists as a monomer due to an extra pa…	19	58	QRPMAPPPNQQYGQQYGQQYEQQYGQQYGQQNDQQFSQQ
	YOR267C Chr15 complement(822588..824867) [2280 bp; 759 aa] {ON} HRK1Protein kinase implicated in activation of the plasma membrane H(+)-ATPase Pma1p in response to glucose metabolism; plays a role in ion homeostasis	623	671	QNNPQQQQQQQQQQQQQQQQQQQQHHHHQHQNQDKAHSIASDNKSSQQ
	YOR290C Chr15 complement(855147..860258) [5112 bp; 1703 aa] {ON} SNF2Catalytic subunit of the SWI/SNF chromatin remodeling complex involved in transcriptional regulation; contains DNA-stimulated ATPase activity; functions interdependently in transcriptional activation with Snf5p and Snf6p	178	281	QPQNRSLQEHNIQDSNVMPGSQINSPMPQQAQMQQAQFQAQQAQQAQQAQQAQQAQARLQQGRRLPMTMFTAEQSELLKAQITSLKCLVNRKPIPFEFQAVIQ
	YOR329C Chr15 complement(936731..939349) [2619 bp; 872 aa] {ON} SCD5Protein required for normal actin organization and endocytosis; targeting subunit for protein phosphatase type 1; undergoes Crm1p-dependent nuclear-cytoplasmic shuttling; multicopy suppressor of clathrin deficiency	594	701	QNTLPQHQQSHLLSPQNTIPQHQRSQLISPQNTFTQNQPILSPQHTYSNNQATMISPQNTYTNNQQQPQHLPPPPPPRAQQQQQGAIVPPQHMYSNVQKQNNLVPTQ
	YOR329C Chr15 complement(936731..939349) [2619 bp; 872 aa] {ON} SCD5Protein required for normal actin organization and endocytosis; targeting subunit for protein phosphatase type 1; undergoes Crm1p-dependent nuclear-cytoplasmic shuttling; multicopy suppressor of clathrin deficiency	758	835	QNTSAAMNNTQSHQTYIQQQQQQQTQQRIYGGQLSQMQQHPGQLHLNNSDIHSQPNKPNYGMLGQQVHQQQQQQQQQ
	YOR359W Chr15 (1011189..1012760) [1572 bp; 523 aa] {ON} VTS1Post-transcriptional gene regulator; flap-structured DNA-binding and RNA-binding protein; shows genetic interactions with Vti1p; a v-SNARE involved in cis-Golgi membrane traffic; stimulates Dna2p endonuclease activity; contains a SAM domain	31	101	QSSAINKNNPGSNSGNNQGNSSVTANVLSPQSHSMSLNDMLDQQSFMLDTAGTRAQPLQQQQQQQQQQQQ
	YOR372C Chr15 complement(1034807..1036471) [1665 bp; 554 aa] {ON} NDD1Transcriptional activator essential for nuclear division; localized to the nucleus; essential component of the mechanism that activates the expression of a set of late-S-phase-specific genes	95	113	QQIQQQQQQQQQQQQQQQ
	YPL229W Chr16 (117067..117687) [621 bp; 206 aa] {ON} Putative protein of unknown function; green fluorescent protein (GFP)-fusion protein localizes to the cytoplasm; YPL229W is not an essential gene	31	65	QNFKYDRLQQQQQQQQQQQQNRTASSLQQPQQQQ
	YPL223C Chr16 complement(128632..129138) [507 bp; 168 aa] {ON} GRE1Hydrophilin essential in dessication-rehydration process; stress induced (osmotic; ionic; oxidative; heat shock and heavy metals); regulated by the HOG pathway	27	84	QTRQQRHEKHQQREFRNQGSKADPYGEENQGNFPQRQQPQSNLGGNTQFGGNDFQQQ
	YPL204W Chr16 (164276..165760) [1485 bp; 494 aa] {ON} HRR25Protein kinase involved in regulating diverse events including vesicular trafficking; DNA repair; and chromosome segregation; binds the CTD of RNA pol II; homolog of mammalian casein kinase 1delta (CK1delta)	394	490	QQQPQQQVQSSQPQPQPQQLQQQPNGQRPNYYPEPLLQQQQRDSQEQQQQVPMATTRATQYPPQINSNNFNTNQASVPPQMRSNPQQPPQDKPAGQ
	YPL203W Chr16 (166256..167398) [1143 bp; 380 aa] {ON} TPK2cAMP-dependent protein kinase catalytic subunit; promotes vegetative growth in response to nutrients via the Ras-cAMP signaling pathway; partially redundant with Tpk1p and Tpk3p; localizes to P-bodies during stationary phase	8	71	QPVGQTIQQQNVNTYGQGVLQPHHDLQQRQQQQQQRQHQQLLTSQLPQKSLVSKGKYTLHDFQ
	YPL190C Chr16 complement(185317..187725) [2409 bp; 802 aa] {ON} NAB3RNA-binding protein; subunit of Nrd1 complex (Nrd1p-Nab3p-Sen1p); complex interacts with the exosome to mediate 3&#8242; end formation of some mRNAs; snRNAs; snoRNAs; and CUTs; required for termination of non-poly(A) transcripts and efficient splicing	589	728	QTNYYQGYSMPPPQQQQQQPYGNYGMPPPSHDQGYGSQPPIPMNQSYGRYQTSIPPPPPQQQIPQGYGRYQAGPPPQPPSQTPMDQQQLLSAIQNLPPNVVSNLLSMAQQQQQQPHAQQQLVGLIQSMQGQAPQQQQQQ
	YPL190C Chr16 complement(185317..187725) [2409 bp; 802 aa] {ON} NAB3RNA-binding protein; subunit of Nrd1 complex (Nrd1p-Nab3p-Sen1p); complex interacts with the exosome to mediate 3&#8242; end formation of some mRNAs; snRNAs; snoRNAs; and CUTs; required for termination of non-poly(A) transcripts and efficient splicing	749	801	QNISAKPSAPPMSHQPPPPQQQQQQQQQQQQQQQQPAGNNVQSLLDSLAKLQ
	YPL153C Chr16 complement(261727..264192) [2466 bp; 821 aa] {ON} RAD53Protein kinase; required for cell-cycle arrest in response to DNA damage; activated by trans autophosphorylation when interacting with hyperphosphorylated Rad9p; also interacts with ARS1 and plays a role in initiation of DNA replication	473	530	QSYGDFSQISLSQSLSQQKLLENMDDAQYEFVKAQRKLQMEQQLQEQDQEDQDGKIQ
	YPL032C Chr16 complement(488887..491364) [2478 bp; 825 aa] {ON} SVL3Protein of unknown function; mutant phenotype suggests a potential role in vacuolar function; green fluorescent protein (GFP)-fusion protein localizes to the cell periphery; cytoplasm; bud; and bud neck	356	427	QILQSLQKSQKNESALQTQITSLQGQISKLRQELLMQAKQHEMETNELKEKHQVALKAQAQAQAQAQSQAQ
	YPL026C Chr16 complement(500675..502183) [1509 bp; 502 aa] {ON} SKS1Putative serine/threonine protein kinase; involved in the adaptation to low concentrations of glucose independent of the SNF3 regulated pathway	375	411	QEQQQQQQQQQQQVQEQEQEQKQEQIQNQEQAQQQQ
	YPL016W Chr16 (521014..524958) [3945 bp; 1314 aa] {ON} SWI1Subunit of the SWI/SNF chromatin remodeling complex; regulates transcription by remodeling chromatin; required for transcription of many genes; including ADH1; ADH2; GAL1; HO; INO1 and SUC2; can form the prion [SWI+]; human homolog ARID1A is a candidate tumor suppressor gene in breast cancer	336	408	QQKQQQRFQALQQQQQQQQNQQQQNQQPQQQQQQQQNPKFLQSQRQQQQRSILQSLNPALQEKISTELNNKQ
	YPR022C Chr16 complement(603911..607312) [3402 bp; 1133 aa] {ON} Putative transcription factor; as suggested by computational analysis; green fluorescent protein (GFP)-fusion protein localizes to both the cytoplasm and the nucleus and is induced in response to the DNA-damaging agent MMS	149	226	QESKFRPFLQQAQQPQQVQQSQQPQQIQQLQQLQFPQQLRAPLQQPMLQQQMHPQQASPTFPSYDPRIRNNGQNGNQ
	YPR022C Chr16 complement(603911..607312) [3402 bp; 1133 aa] {ON} Putative transcription factor; as suggested by computational analysis; green fluorescent protein (GFP)-fusion protein localizes to both the cytoplasm and the nucleus and is induced in response to the DNA-damaging agent MMS	254	320	QNMNINPAVQQQRYQDRNFASSSYQQPLQPLTQDQQQEQYFQQQKLAQQQQQQQQQQQQQQQLPPQ
	YPR065W Chr16 (679693..680799) [1107 bp; 368 aa] {ON} ROX1Heme-dependent repressor of hypoxic genes; contains an HMG domain that is responsible for DNA bending activity	93	123	QLLLKEIEQQQQQQQKEQQQQKQSQPQLQQ
	YPR154W Chr16 (834565..835212) [648 bp; 215 aa] {ON} PIN3Protein that induces appearance of [PIN+] prion when overproduced	125	181	QYKAQELQQIPTQNSAASSYQQQPFPPPSTNYYQQPQQQPQQAPPPQQQQQQQQHQ
	YPR185W Chr16 (907218..909434) [2217 bp; 738 aa] {ON} ATG13Regulatory subunit of the Atg1p signaling complex; stimulates Atg1p kinase activity; required for vesicle formation during autophagy and the cytoplasm-to-vacuole targeting (Cvt) pathway; involved in Atg9p; Atg23p; and Atg27p cycling	285	338	QGPQNQPEQEGQSDQDIGKRQPQFQQQQQPQQQQQQQQQQQRQHQVQTQQQRQ
