# Supplementary material for: SWI/SNF senses carbon starvation with a pH-sensitive low-complexity sequence
Source: eLife. 2022 Feb 7;11:e70344. doi: 10.7554/eLife.70344 (PMC8890752; doi:10.7554/eLife.70344)
Supplement: Supplementary file 2. — Comparison of the IDRs of SNF5 orthologues from Ascomycete fungi, with the number of glutamines and histidines indicated. [file elife-70344-supp2.xlsx]

## Sheet: Sheet1
Species	Number of His	Number of Gln	Total length
V. polyspora	6	84	390
T. phaffii	4	107	338
T. blattae	8	187	590
N. dairenensis	5	92	339
N. castellii	6	77	325
K. naganishii	5	109	416
K. africana	6	88	334
C. glabrata	4	46	262
S. uvarum	9	119	297
S. kudriavzevii	3	89	265
S. mikatae	5	136	318
S. cerevisiae	7	125	300
Z. rouxii	10	122	405
T. delbrueckii	6	76	304
K. lactis	4	109	312
E. gossypii	34	253	593
E. cymbalariae	9	100	261
L. kluyveri	7	81	223
L. thermotolerans	15	119	291
L. waltii	8	91	279
