# Supplementary material for: SWI/SNF senses carbon starvation with a pH-sensitive low-complexity sequence
Source: eLife. 2022 Feb 7;11:e70344. doi: 10.7554/eLife.70344 (PMC8890752; doi:10.7554/eLife.70344)
Supplement: Supplementary file 3. — The YEASTRACT server used to find transcription factors enriched within the promoters of each of four gene sets defined by hierarchical clustering of genes significantly regulated upon carbon starvation (see Figure 4E). YEASTRACT search settings were DNA binding plus expression evidence; TF acting as either activator or inhibitor. [file elife-70344-supp3.xlsx]

## Sheet: SupTable3
Group	TF	Fraction group promoters	Fraction promoters in total genome	p value	Target promoters
	Gis1	0.6667	0.0476	< 1E-13	CIT2, ADY2, NDE2, CTA1, STL1, ICL1, HSP12, SPG1, PEX18, POT1, RGI2, JEN1, PCK1, IDP2, FBP1, CAT2, SPG4, SIP18, ADH2, ALP1, MLS1, LPX1, CRC1, GRE1, CIT3, PDH1, YAT1, ECM13
	Adr1	0.6429	0.0346	< 1E-13	ADY2, CTA1, ATO3, STL1, HSP12, POX1, SPG1, ARO9, POT1, RGI2, JEN1, FOX2, IDP2, FBP1, CAT2, SPG4, ADH2, ALP1, SPS19, MLS1, LPX1, CRC1, CIT3, PDH1, ACS1, ECM13, ARG3
	Cat8	0.5952	0.1412	< 1E-13	CIT2, ADY2, CTA1, ATO3, STL1, YAT2, ICL1, POX1, SPG1, ARO9, POT1, SFC1, JEN1, FOX2, PCK1, IDP2, FBP1, CAT2, ADH2, MLS1, LPX1, CRC1, ACS1, YAT1, SIP4
	Bas1	0.9286	0.013	2.2e-13	CIT2, ADY2, NDE2, CTA1, ATO3, STL1, YAT2, ICL1, HSP12, POX1, SPG1, ARO9, PEX18, POT1, RGI2, SFC1, JEN1, PCK1, IDP2, FBP1, CAT2, SPG4, SIP18, ADH2, ALP1, SPS19, MLS1, LPX1, CRC1, GRE1, CIT3, PDH1, ACS1, YAT1, ECM13, SIP4, ARG3, DPA10, YAR035C-A
	Oaf1	0.5476	0.025	1.22e-11	CIT2, ADY2, CTA1, ATO3, STL1, YAT2, ICL1, POX1, PEX18, POT1, FOX2, PCK1, SPG4, SIP18, ADH2, ALP1, SPS19, MLS1, LPX1, CRC1, GRE1, CIT3, YAT1
	Yox1	0.5476	0.0214	3.46e-10	CIT2, ADY2, NDE2, CTA1, STL1, YAT2, ICL1, HSP12, SPG1, PEX18, POT1, RGI2, JEN1, PCK1, CAT2, SPG4, ADH2, MLS1, GRE1, ACS1, YAT1, SIP4, DPA10
	Xbp1	0.6429	0.0176	3.55e-10	CIT2, ADY2, NDE2, CTA1, ATO3, STL1, ICL1, HSP12, POX1, ARO9, PEX18, POT1, RGI2, SFC1, FOX2, PCK1, IDP2, FBP1, CAT2, SPG4, MLS1, CRC1, CIT3, PDH1, YAT1, DPA10, YAR035C-A
	Gln3	0.7857	0.0137	4.11e-10	CIT2, NDE2, CTA1, ATO3, STL1, YAT2, ICL1, HSP12, SPG1, ARO9, PEX18, POT1, RGI2, JEN1, PCK1, IDP2, FBP1, CAT2, SPG4, SIP18, ADH2, SPS19, MLS1, LPX1, CRC1, IRC13, CIT3, PDH1, ACS1, YAT1, ECM13, SIP4, ARG3
	Sok2	0.7381	0.0135	5.21e-09	CIT2, ADY2, ATO3, STL1, YAT2, ICL1, HSP12, POX1, SPG1, PEX18, POT1, RGI2, SFC1, JEN1, FOX2, FBP1, CAT2, SPG4, SIP18, ADH2, SPS19, MLS1, CRC1, GRE1, CIT3, PDH1, ACS1, YAT1, ECM13, SIP4, ARG3
	Rme1	0.381	0.0247	4.51e-08	ADY2, ICL1, HSP12, POX1, ARO9, PEX18, SFC1, JEN1, FOX2, FBP1, CAT2, SPG4, GRE1, CIT3, ACS1, SIP4
1	Hac1	0.5476	0.0158	1.8e-07	ADY2, NDE2, CTA1, ATO3, STL1, YAT2, ICL1, HSP12, SPG1, PEX18, POT1, RGI2, JEN1, FOX2, IDP2, ADH2, SPS19, MLS1, CRC1, IRC13, YAT1, SIP4, ARG3
	Sfl1	0.3333	0.0223	1.3e-06	ADY2, NDE2, CTA1, ATO3, STL1, YAT2, ICL1, HSP12, SPG1, PEX18, POT1, RGI2, JEN1, FOX2, IDP2, ADH2, SPS19, MLS1, CRC1, IRC13, YAT1, SIP4, ARG3
	Hot1	0.1429	0.0583	1.9e-06	STL1, ICL1, HSP12, SPG4, SIP18, GRE1
	Gat4	0.2619	0.0271	2.28e-06	NDE2, HSP12, ARO9, PEX18, SFC1, JEN1, PCK1, CAT2, SPG4, LPX1, ECM13
	Fhl1	0.5952	0.0128	2.61e-06	CIT2, ADY2, NDE2, STL1, HSP12, POX1, SPG1, ARO9, PEX18, POT1, RGI2, SFC1, JEN1, FOX2, PCK1, SPG4, SIP18, SPS19, MLS1, CRC1, GRE1, CIT3, ACS1, SIP4, ARG3
	Tog1	0.1905	0.0367	3.65e-06	ICL1, POX1, POT1, FOX2, PCK1, IDP2, FBP1, MLS1
	Hsf1	0.5476	0.0128	1.02e-05	CIT2, ADY2, NDE2, ATO3, STL1, HSP12, POX1, ARO9, RGI2, SFC1, IDP2, CAT2, SPG4, SIP18, ADH2, SPS19, MLS1, CRC1, PDH1, ACS1, ECM13, SIP4, ARG3
	Ixr1	0.6429	0.0111	1.6e-05	ADY2, NDE2, CTA1, ATO3, STL1, YAT2, HSP12, SPG1, ARO9, RGI2, SFC1, FOX2, IDP2, FBP1, CAT2, SIP18, ADH2, ALP1, MLS1, YNL013C, CRC1, GRE1, ACS1, YAT1, ECM13, SIP4, YAR035C-A
	Rgm1	0.2857	0.0203	2e-05	STL1, HSP12, POX1, ARO9, SFC1, PCK1, IDP2, FBP1, CAT2, LPX1, CIT3, PDH1
	Ume6	0.4762	0.0136	2.09e-05	CIT2, ADY2, STL1, HSP12, SPG1, ARO9, SFC1, FOX2, FBP1, CAT2, SPG4, SIP18, ALP1, CRC1, PDH1, ACS1, YAT1, ECM13, SIP4, ARG3
	Msn4	0.6429	0.0109	2.36e-05	CIT2, NDE2, CTA1, STL1, YAT2, ICL1, HSP12, POX1, ARO9, PEX18, POT1, RGI2, FOX2, PCK1, IDP2, CAT2, SPG4, SIP18, SPS19, MLS1, LPX1, CRC1, GRE1, CIT3, PDH1, YAT1, SIP4
	Sip4	0.1667	0.031	4.17e-05	SFC1, PCK1, FBP1, ADH2, MLS1, ACS1, SIP4
	Mig3	0.5	0.0126	4.18e-05	CIT2, NDE2, CTA1, ATO3, STL1, HSP12, POX1, ARO9, PEX18, POT1, SFC1, JEN1, PCK1, FBP1, CAT2, SPG4, SIP18, CRC1, IRC13, ACS1, YAT1
	Gat4	0.322	0.0468	2.85e-11	HSP30, YCR102C, TRR1, TSA2, QCR7, COX13, TRX2, OM45, REE1, YLR012C, YMR090W, PAI3, HOR7, YNL134C, TMA16, OYE3, SSA3, HSP26, TDH1
	Pho2	0.4407	0.0244	1.42e-08	CHA1, MIC10, YCR102C, YDR149C, TRR1, TSA2, QCR7, COX13, CGR1, STF2, NQM1, CUP1-1, CUP1-2, SPL2, OM45, BAT2, SRX1, YKL030W, YLR460C, PAI3, HOR7, YNL134C, EGO4, YOR338W, TDH1, LYS20
	Mig3	0.5085	0.018	1.06e-06	HSP30, YCR102C, TRR1, TSA2, CGR1, NQM1, TRX2, CUP1-1, CUP1-2, SPL2, YIL168W, SDL1, BAT2, SRX1, CIS1, YLR460C, YMR090W, PAI3, SUI1, YNL194C, YNL134C, EGO4, TMA16, YOR338W, EEB1, AI1, AI2, HSP26, LYS20, YMR046C
2	Tbs1	0.1186	0.0686	1.61e-06	YCR102C, SPL2, REE1, YLR460C, ATP18, YNL134C, LYS20
	Gis1	0.2712	0.0272	3.09e-06	TSA2, QCR7, COX13, STF2, NQM1, TRX2, OM45, REE1, YLR012C, YMR090W, PAI3, YNL194C, YNL134C, SSA3, HSP26, TDH1
	Hsf1	0.4915	0.0161	1.95e-05	CHA1, GRX1, HSP30, YCR102C, TSA2, COX13, STF2, NQM1, CUP1-1, CUP1-2, SPL2, REE1, BAT2, SRX1, YKL030W, YMR090W, PAI3, HOR7, SUI1, YNL194C, YNL134C, YOR338W, OYE3, SSA3, HSP26, TDH1, LYS20, YBL005W-A, YMR046C
	Fhl1	0.5085	0.0154	3.28e-05	CHA1, GRX1, HSP30, TSA2, QCR7, COX13, STF2, NQM1, CUP1-1, CUP1-2, SPL2, YIL168W, OM45, REE1, YLR012C, YMR090W, PAI3, HOR7, SUI1, YNL194C, YNL134C, EGO4, RRS1, YOR338W, OYE3, AI1, HSP26, TDH1, COQ21, LYS20
	Arr1	0.56	0.026	2.96e-12	VID24, FUS1, MET32, HXT7, DSF1, GSY1, MIG2, RCK1, MUP1, IMA1, YHR022C, HXT4, OPT1, YJR115W, MSN4, PHD1, UGP1, YKR075C, MHT1, MMP1, ICT1, TIS11, HXT2, MET2, YNR014W, MAN2, SAM3, BNA3
	Mig2	0.26	0.043	1.04e-08	EMI2, GSY1, FMP48, IMA1, HXT4, YHR210C, SUC2, RPI1, OPT1, YJR115W, ICT1, HXT2, MAN2
	Yh1	0.44	0.0226	2.7e-08	VID24, FUS1, HXT7, EMI2, GSY1, MIG2, RCK1, FMP48, IMA1, OPT1, MSN4, PHD1, MMP1, HSP104, SSA2, ICT1, HXT2, FET3, YNR014W, MAN2, PFK27, CLN3
	Opi1	0.26	0.0347	1.6e-07	FUS1, HXT7, LPP1, EMI2, MIG2, HXT4, MET3, PHD1, UGP1, MMP1, ICT1, TIS11, SAM3
	Gis1	0.32	0.0272	2.22e-07	HXT7, RCK1, FMP48, MUP1, SPR3, IMA1, YHR022C, YHR210C, SUC2, MSN4, YKR075C, MMP1, TIS11, HXT2, YNR014W, MAN2
	Rox1	0.4	0.022	2.31e-07	VID24, FUS1, HXT7, EMI2, GSY1, MIG2, RCK1, IMA1, YHR210C, SUC2, RPI1, PHD1, UGP1, SSA2, ICT1, TIS11, HXT2, FET3, YMR320W, YNR014W
	Sfl1	0.32	0.0255	5.7e-07	FUS1, DSF1, RCK1, FMP48, OPT1, YJR115W, MSN4, PHD1, YKR075C, HSP104, ICT1, TIS11, FET3, YNR068C, MAN2, BNA3
	Hac1	0.48	0.0165	2.88e-06	VID24, FUS1, HXT7, LPP1, EMI2, DSF1, GSY1, STR3, RCK1, YHR022C, HXT4, YHR210C, RPI1, MET28, MET3, YJR115W, ICT1, FET3, YMR320W, MET2, YNR014W, YNR068C, MAN2, BNA3
	Yrr1	0.56	0.0146	3.13e-06	HXT7, EMI2, GSY1, MIG2, STR3, MUP1, HXT4, OPT1, MET3, MSN4, PHD1, UGP1, YKR075C, MHT1, MMP1, HSP104, SSA2, ICT1, TIS11, HXT2, FET3, MET2, YNR014W, YNR068C, MAN2, PFK27, SAM3, BNA3
	Yox1	0.4	0.0186	3.87e-06	VID24, FUS1, MET32, GSY1, MIG2, RCK1, FMP48, IMA1, YHR210C, SUC2, OPT1, MSN4, PHD1, MMP1, SSA2, ICT1, HXT2, YNR014W, MAN2, CLN3
3	Aft1	0.42	0.0178	4.36e-06	VID24, MET32, HXT7, EMI2, GSY1, SPR3, IMA1, HXT4, MET28, MET3, YJR115W, MSN4, UGP1, YKR075C, HSP104, ICT1, TIS11, HXT2, FET3, YMR320W, YNR014W
	Mig1	0.28	0.0241	6e-06	FUS1, HXT7, GSY1, FMP48, IMA1, YHR022C, HXT4, SUC2, RPI1, PHD1, MMP1, ICT1, HXT2, YNR014W
	Mig3	0.5	0.015	1.01e-05	FUS1, MET32, HXT7, GSY1, MIG2, STR3, FMP48, IMA1, MET28, OPT1, MSN4, PHD1, YKR075C, MHT1, MMP1, HSP104, SSA2, ICT1, TIS11, HXT2, FET3, MET2, YNR068C, MAN2, PFK27
	Sok2	0.6	0.0131	1.26e-05	VID24, FUS1, YDR249C, HXT7, EMI2, GSY1, MIG2, RCK1, FMP48, SPR3, YHR022C, HXT4, SUC2, RPI1, MET28, OPT1, YJR115W, MSN4, PHD1, HSP104, SSA2, ICT1, HXT2, FET3, MET2, YNR068C, MAN2, PFK27, IRC10, SAM3
	Gzf3	0.24	0.0255	1.39e-05	VID24, FUS1, FMP48, SUC2, YKR075C, MMP1, SSA2, ICT1, TIS11, YNR014W, MAN2, BNA3
	Ixr1	0.62	0.0127	1.44e-05	MET32, HXT7, PLM2, DSF1, GSY1, STR3, RCK1, FMP48, MUP1, YHR022C, HXT4, YHR210C, SUC2, RPI1, MET28, OPT1, MET3, MSN4, UGP1, YKR075C, MHT1, SSA2, HXT2, MET2, YNR068C, MAN2, YOL134C, IRC10, SAM3, CLN3, BNA3
	Mot3	0.34	0.0192	1.55e-05	FUS1, HXT7, GSY1, FMP48, IMA1, YHR022C, HXT4, SUC2, RPI1, PHD1, HSP104, HXT2, FET3, MAN2, PFK27, SAM3, YPR050C
	Mga1	0.34	0.0191	1.58e-05	FUS1, HXT7, DSF1, YHR022C, HXT4, YHR210C, OPT1, MSN4, YKR075C, MHT1, HSP104, SSA2, ICT1, TIS11, MET2, YNR014W, MAN2
	Rme1	0.28	0.0216	2.17e-05	VID24, FUS1, MET32, STR3, IMA1, SUC2, RPI1, MET3, PHD1, FET3, MET2, YNR014W, PFK27, SAM3
	Cup2	0.3	0.0202	2.71e-05	HXT7, DSF1, GSY1, FMP48, MUP1, YHR022C, HXT4, RPI1, HSP104, ICT1, TIS11, HXT2, FET3, YNR068C, CLN3
	Rgm1	0.26	0.022	3.42e-05	HXT7, GSY1, HXT4, SUC2, RPI1, MSN4, HSP104, ICT1, FET3, YNR068C, MAN2, PFK27, IRC10
	Stp1	0.32	0.0184	4.77e-05	VID24, EMI2, STR3, MUP1, RPI1, MET28, OPT1, MET3, PHD1, UGP1, MMP1, ICT1, TIS11, YMR320W, MET2, IRC10
4	Cst6	0.875	0.0047	1.79e-05	ARO4, HXT3, HXK2, SCW4, HXT1, YJL218W, GPM1, KTI12, SHM2, RPS31, RPP0, ADE17, MF(ALPHA)1, YBL111C
	Rgt1	0.375	0.0134	2.52e-05	HXT3, HXK2, SCW4, HXT1, RPP0, MF(ALPHA)1

## Sheet: Sheet1 (2)
Heatmap Group	ID	TF	%.userset	% genome	p.value	Target.ORF	Protein.DBID	Protein.Systematic.Name	Protein.Molecular.Weight	Protein.PI	Protein.Median	Protein.Protein.abudnance.median.absolute.deviation	Protein.Length
1	1	Gis1p	0.6667	0.0476	0	CIT2,ADY2,NDE2,CTA1,STL1,ICL1,HSP12,SPG1,PEX18,POT1,RGI2,JEN1,PCK1,IDP2,FBP1,CAT2,SPG4,SIP18,ADH2,ALP1,MLS1,LPX1,CRC1,GRE1,CIT3,PDH1,YAT1,ECM13	S000002503	YDR096W	99482.5	7.58	2162	1730	894
1	2	Adr1p	0.6429	0.0346	0	ADY2,CTA1,ATO3,STL1,HSP12,POX1,SPG1,ARO9,POT1,RGI2,JEN1,FOX2,IDP2,FBP1,CAT2,SPG4,ADH2,ALP1,SPS19,MLS1,LPX1,CRC1,CIT3,PDH1,ACS1,ECM13,ARG3	S000002624	YDR216W	150929	6.71	1576	690	1323
1	3	Cat8p	0.5952	0.1412	0	CIT2,ADY2,CTA1,ATO3,STL1,YAT2,ICL1,POX1,SPG1,ARO9,POT1,SFC1,JEN1,FOX2,PCK1,IDP2,FBP1,CAT2,ADH2,MLS1,LPX1,CRC1,ACS1,YAT1,SIP4	S000004893	YMR280C	160515	9.48	827	313	1433
1	4	Bas1p	0.9286	0.013	2.2e-13	CIT2,ADY2,NDE2,CTA1,ATO3,STL1,YAT2,ICL1,HSP12,POX1,SPG1,ARO9,PEX18,POT1,RGI2,SFC1,JEN1,PCK1,IDP2,FBP1,CAT2,SPG4,SIP18,ADH2,ALP1,SPS19,MLS1,LPX1,CRC1,GRE1,CIT3,PDH1,ACS1,YAT1,ECM13,SIP4,ARG3,DPA10,YAR035C-A	S000001807	YKR099W	89607.4	8.42	1754	711	811
1	5	Oaf1p	0.5476	0.025	1.22e-11	CIT2,ADY2,CTA1,ATO3,STL1,YAT2,ICL1,POX1,PEX18,POT1,FOX2,PCK1,SPG4,SIP18,ADH2,ALP1,SPS19,MLS1,LPX1,CRC1,GRE1,CIT3,YAT1	S000000048	YAL051W	118886	6.98	744	684	1047
1	6	Yox1p	0.5476	0.0214	3.46e-10	CIT2,ADY2,NDE2,CTA1,STL1,YAT2,ICL1,HSP12,SPG1,PEX18,POT1,RGI2,JEN1,PCK1,CAT2,SPG4,ADH2,MLS1,GRE1,ACS1,YAT1,SIP4,DPA10	S000004489	YML027W	42769.3	11.07	1402	263	385
1	7	Xbp1p	0.6429	0.0176	3.55e-10	CIT2,ADY2,NDE2,CTA1,ATO3,STL1,ICL1,HSP12,POX1,ARO9,PEX18,POT1,RGI2,SFC1,FOX2,PCK1,IDP2,FBP1,CAT2,SPG4,MLS1,CRC1,CIT3,PDH1,YAT1,DPA10,YAR035C-A	S000001363	YIL101C	72707.4	9.71	903	708	647
1	8	Gln3p	0.7857	0.0137	4.11e-10	CIT2,NDE2,CTA1,ATO3,STL1,YAT2,ICL1,HSP12,SPG1,ARO9,PEX18,POT1,RGI2,JEN1,PCK1,IDP2,FBP1,CAT2,SPG4,SIP18,ADH2,SPS19,MLS1,LPX1,CRC1,IRC13,CIT3,PDH1,ACS1,YAT1,ECM13,SIP4,ARG3	S000000842	YER040W	79401	10.2	1802	1135	730
1	9	Sok2p	0.7381	0.0135	5.21e-09	CIT2,ADY2,ATO3,STL1,YAT2,ICL1,HSP12,POX1,SPG1,PEX18,POT1,RGI2,SFC1,JEN1,FOX2,FBP1,CAT2,SPG4,SIP18,ADH2,SPS19,MLS1,CRC1,GRE1,CIT3,PDH1,ACS1,YAT1,ECM13,SIP4,ARG3	S000004618	YMR016C	85648.4	8.82	2287	1169	785
1	10	Rme1p	0.381	0.0247	4.51e-08	ADY2,ICL1,HSP12,POX1,ARO9,PEX18,SFC1,JEN1,FOX2,FBP1,CAT2,SPG4,GRE1,CIT3,ACS1,SIP4	S000003276	YGR044C	33902.6	7.12	1441	441	300
1	11	Hac1p	0.5476	0.0158	1.8e-07	ADY2,NDE2,CTA1,ATO3,STL1,YAT2,ICL1,HSP12,SPG1,PEX18,POT1,RGI2,JEN1,FOX2,IDP2,ADH2,SPS19,MLS1,CRC1,IRC13,YAT1,SIP4,ARG3	S000001863	YFL031W	26894	4.73	5374	3596	238
1	12	Sfl1p	0.3333	0.0223	1.3e-06	ADY2,NDE2,CTA1,ATO3,STL1,YAT2,ICL1,HSP12,SPG1,PEX18,POT1,RGI2,JEN1,FOX2,IDP2,ADH2,SPS19,MLS1,CRC1,IRC13,YAT1,SIP4,ARG3	S000005666	YOR140W	83351.7	9.13	1234	1212	766
1	13	Hot1p	0.1429	0.0583	1.9e-06	STL1,ICL1,HSP12,SPG4,SIP18,GRE1	S000004783	YMR172W	79418.1	8.24	573	479	719
1	14	Gat4p	0.2619	0.0271	2.28e-06	NDE2,HSP12,ARO9,PEX18,SFC1,JEN1,PCK1,CAT2,SPG4,LPX1,ECM13	S000001452	YIR013C	13260.9	11.4	NA	NA	121
1	15	Fhl1p	0.5952	0.0128	2.61e-06	CIT2,ADY2,NDE2,STL1,HSP12,POX1,SPG1,ARO9,PEX18,POT1,RGI2,SFC1,JEN1,FOX2,PCK1,SPG4,SIP18,SPS19,MLS1,CRC1,GRE1,CIT3,ACS1,SIP4,ARG3	S000006308	YPR104C	103484	5.64	1926	765	936
1	16	Tog1p	0.1905	0.0367	3.65e-06	ICL1,POX1,POT1,FOX2,PCK1,IDP2,FBP1,MLS1	S000000986	YER184C	91083	7.8	5	NA	794
1	17	Hsf1p	0.5476	0.0128	1.02e-05	CIT2,ADY2,NDE2,ATO3,STL1,HSP12,POX1,ARO9,RGI2,SFC1,IDP2,CAT2,SPG4,SIP18,ADH2,SPS19,MLS1,CRC1,PDH1,ACS1,ECM13,SIP4,ARG3	S000003041	YGL073W	93253.3	5.06	2222	1099	833
1	18	Ixr1p	0.6429	0.0111	1.6e-05	ADY2,NDE2,CTA1,ATO3,STL1,YAT2,HSP12,SPG1,ARO9,RGI2,SFC1,FOX2,IDP2,FBP1,CAT2,SIP18,ADH2,ALP1,MLS1,YNL013C,CRC1,GRE1,ACS1,YAT1,ECM13,SIP4,YAR035C-A	S000001515	YKL032C	67858.1	8.36	3621	1963	597
1	19	Rgm1p	0.2857	0.0203	2e-05	STL1,HSP12,POX1,ARO9,SFC1,PCK1,IDP2,FBP1,CAT2,LPX1,CIT3,PDH1	S000004794	YMR182C	23865.6	10.01	1601	969	211
1	20	Ume6p	0.4762	0.0136	2.09e-05	CIT2,ADY2,STL1,HSP12,SPG1,ARO9,SFC1,FOX2,FBP1,CAT2,SPG4,SIP18,ALP1,CRC1,PDH1,ACS1,YAT1,ECM13,SIP4,ARG3	S000002615	YDR207C	91154.5	10.11	1199	740	836
1	21	Msn4p	0.6429	0.0109	2.36e-05	CIT2,NDE2,CTA1,STL1,YAT2,ICL1,HSP12,POX1,ARO9,PEX18,POT1,RGI2,FOX2,PCK1,IDP2,CAT2,SPG4,SIP18,SPS19,MLS1,LPX1,CRC1,GRE1,CIT3,PDH1,YAT1,SIP4	S000001545	YKL062W	69720.5	7.24	3334	2127	630
1	22	Sip4p	0.1667	0.031	4.17e-05	SFC1,PCK1,FBP1,ADH2,MLS1,ACS1,SIP4	S000003625	YJL089W	95998.5	6.51	5733	4552	829
1	23	Mig3p	0.5	0.0126	4.18e-05	CIT2,NDE2,CTA1,ATO3,STL1,HSP12,POX1,ARO9,PEX18,POT1,SFC1,JEN1,PCK1,FBP1,CAT2,SPG4,SIP18,CRC1,IRC13,ACS1,YAT1	S000000830	YER028C	43140	10.55	1618	403	394
2	24	Gat4p	0.322	0.0468	2.85e-11	HSP30,YCR102C,TRR1,TSA2,QCR7,COX13,TRX2,OM45,REE1,YLR012C,YMR090W,PAI3,HOR7,YNL134C,TMA16,OYE3,SSA3,HSP26,TDH1	S000001452	YIR013C	13260.9	11.4	NA	NA	121
2	25	Pho2p	0.4407	0.0244	1.42e-08	CHA1,MIC10,YCR102C,YDR149C,TRR1,TSA2,QCR7,COX13,CGR1,STF2,NQM1,CUP1-1,CUP1-2,SPL2,OM45,BAT2,SRX1,YKL030W,YLR460C,PAI3,HOR7,YNL134C,EGO4,YOR338W,TDH1,LYS20	S000002264	YDL106C	63362.5	4.7	2345	559	559
2	26	Mig3p	0.5085	0.018	1.06e-06	HSP30,YCR102C,TRR1,TSA2,CGR1,NQM1,TRX2,CUP1-1,CUP1-2,SPL2,YIL168W,SDL1,BAT2,SRX1,CIS1,YLR460C,YMR090W,PAI3,SUI1,YNL194C,YNL134C,EGO4,TMA16,YOR338W,EEB1,AI1,AI2,HSP26,LYS20,YMR046C	S000000830	YER028C	43140	10.55	1618	403	394
2	27	Tbs1p	0.1186	0.0686	1.61e-06	YCR102C,SPL2,REE1,YLR460C,ATP18,YNL134C,LYS20	S000000354	YBR150C	126863	5.06	779	483	1094
2	28	Gis1p	0.2712	0.0272	3.09e-06	TSA2,QCR7,COX13,STF2,NQM1,TRX2,OM45,REE1,YLR012C,YMR090W,PAI3,YNL194C,YNL134C,SSA3,HSP26,TDH1	S000002503	YDR096W	99482.5	7.58	2162	1730	894
2	29	Hsf1p	0.4915	0.0161	1.95e-05	CHA1,GRX1,HSP30,YCR102C,TSA2,COX13,STF2,NQM1,CUP1-1,CUP1-2,SPL2,REE1,BAT2,SRX1,YKL030W,YMR090W,PAI3,HOR7,SUI1,YNL194C,YNL134C,YOR338W,OYE3,SSA3,HSP26,TDH1,LYS20,YBL005W-A,YMR046C	S000003041	YGL073W	93253.3	5.06	2222	1099	833
2	30	Fhl1p	0.5085	0.0154	3.28e-05	CHA1,GRX1,HSP30,TSA2,QCR7,COX13,STF2,NQM1,CUP1-1,CUP1-2,SPL2,YIL168W,OM45,REE1,YLR012C,YMR090W,PAI3,HOR7,SUI1,YNL194C,YNL134C,EGO4,RRS1,YOR338W,OYE3,AI1,HSP26,TDH1,COQ21,LYS20	S000006308	YPR104C	103484	5.64	1926	765	936
3	31	Arr1p	0.56	0.026	2.96e-12	VID24,FUS1,MET32,HXT7,DSF1,GSY1,MIG2,RCK1,MUP1,IMA1,YHR022C,HXT4,OPT1,YJR115W,MSN4,PHD1,UGP1,YKR075C,MHT1,MMP1,ICT1,TIS11,HXT2,MET2,YNR014W,MAN2,SAM3,BNA3	S000006403	YPR199C	33230.5	8.21	1157	NA	294
3	32	Mig2p	0.26	0.043	1.04e-08	EMI2,GSY1,FMP48,IMA1,HXT4,YHR210C,SUC2,RPI1,OPT1,YJR115W,ICT1,HXT2,MAN2	S000003177	YGL209W	42062.9	10.35	2274	1128	382
3	33	Yhp1p	0.44	0.0226	2.7e-08	VID24,FUS1,HXT7,EMI2,GSY1,MIG2,RCK1,FMP48,IMA1,OPT1,MSN4,PHD1,MMP1,HSP104,SSA2,ICT1,HXT2,FET3,YNR014W,MAN2,PFK27,CLN3	S000002859	YDR451C	39626	10.67	857	386	353
3	34	Opi1p	0.26	0.0347	1.6e-07	FUS1,HXT7,LPP1,EMI2,MIG2,HXT4,MET3,PHD1,UGP1,MMP1,ICT1,TIS11,SAM3	S000001012	YHL020C	46047.4	4.78	2525	1033	404
3	35	Gis1p	0.32	0.0272	2.22e-07	HXT7,RCK1,FMP48,MUP1,SPR3,IMA1,YHR022C,YHR210C,SUC2,MSN4,YKR075C,MMP1,TIS11,HXT2,YNR014W,MAN2	S000002503	YDR096W	99482.5	7.58	2162	1730	894
3	36	Rox1p	0.4	0.022	2.31e-07	VID24,FUS1,HXT7,EMI2,GSY1,MIG2,RCK1,IMA1,YHR210C,SUC2,RPI1,PHD1,UGP1,SSA2,ICT1,TIS11,HXT2,FET3,YMR320W,YNR014W	S000006269	YPR065W	41856.7	10.46	1157	1025	368
3	37	Sfl1p	0.32	0.0255	5.7e-07	FUS1,DSF1,RCK1,FMP48,OPT1,YJR115W,MSN4,PHD1,YKR075C,HSP104,ICT1,TIS11,FET3,YNR068C,MAN2,BNA3	S000005666	YOR140W	83351.7	9.13	1234	1212	766
3	38	Hac1p	0.48	0.0165	2.88e-06	VID24,FUS1,HXT7,LPP1,EMI2,DSF1,GSY1,STR3,RCK1,YHR022C,HXT4,YHR210C,RPI1,MET28,MET3,YJR115W,ICT1,FET3,YMR320W,MET2,YNR014W,YNR068C,MAN2,BNA3	S000001863	YFL031W	26894	4.73	5374	3596	238
3	39	Yrr1p	0.56	0.0146	3.13e-06	HXT7,EMI2,GSY1,MIG2,STR3,MUP1,HXT4,OPT1,MET3,MSN4,PHD1,UGP1,YKR075C,MHT1,MMP1,HSP104,SSA2,ICT1,TIS11,HXT2,FET3,MET2,YNR014W,YNR068C,MAN2,PFK27,SAM3,BNA3	S000005688	YOR162C	92475.9	8.3	622	404	810
3	40	Yox1p	0.4	0.0186	3.87e-06	VID24,FUS1,MET32,GSY1,MIG2,RCK1,FMP48,IMA1,YHR210C,SUC2,OPT1,MSN4,PHD1,MMP1,SSA2,ICT1,HXT2,YNR014W,MAN2,CLN3	S000004489	YML027W	42769.3	11.07	1402	263	385
3	41	Aft1p	0.42	0.0178	4.36e-06	VID24,MET32,HXT7,EMI2,GSY1,SPR3,IMA1,HXT4,MET28,MET3,YJR115W,MSN4,UGP1,YKR075C,HSP104,ICT1,TIS11,HXT2,FET3,YMR320W,YNR014W	S000003039	YGL071W	77672.7	6.88	2431	841	690
3	42	Mig1p	0.28	0.0241	6e-06	FUS1,HXT7,GSY1,FMP48,IMA1,YHR022C,HXT4,SUC2,RPI1,PHD1,MMP1,ICT1,HXT2,YNR014W	S000003003	YGL035C	55550	10.43	2001	648	504
3	43	Mig3p	0.5	0.015	1.01e-05	FUS1,MET32,HXT7,GSY1,MIG2,STR3,FMP48,IMA1,MET28,OPT1,MSN4,PHD1,YKR075C,MHT1,MMP1,HSP104,SSA2,ICT1,TIS11,HXT2,FET3,MET2,YNR068C,MAN2,PFK27	S000000830	YER028C	43140	10.55	1618	403	394
3	44	Sok2p	0.6	0.0131	1.26e-05	VID24,FUS1,YDR249C,HXT7,EMI2,GSY1,MIG2,RCK1,FMP48,SPR3,YHR022C,HXT4,SUC2,RPI1,MET28,OPT1,YJR115W,MSN4,PHD1,HSP104,SSA2,ICT1,HXT2,FET3,MET2,YNR068C,MAN2,PFK27,IRC10,SAM3	S000004618	YMR016C	85648.4	8.82	2287	1169	785
3	45	Gzf3p	0.24	0.0255	1.39e-05	VID24,FUS1,FMP48,SUC2,YKR075C,MMP1,SSA2,ICT1,TIS11,YNR014W,MAN2,BNA3	S000003646	YJL110C	60537.8	9.83	1722	822	551
3	46	Ixr1p	0.62	0.0127	1.44e-05	MET32,HXT7,PLM2,DSF1,GSY1,STR3,RCK1,FMP48,MUP1,YHR022C,HXT4,YHR210C,SUC2,RPI1,MET28,OPT1,MET3,MSN4,UGP1,YKR075C,MHT1,SSA2,HXT2,MET2,YNR068C,MAN2,YOL134C,IRC10,SAM3,CLN3,BNA3	S000001515	YKL032C	67858.1	8.36	3621	1963	597
3	47	Mot3p	0.34	0.0192	1.55e-05	FUS1,HXT7,GSY1,FMP48,IMA1,YHR022C,HXT4,SUC2,RPI1,PHD1,HSP104,HXT2,FET3,MAN2,PFK27,SAM3,YPR050C	S000004674	YMR070W	54387.6	8.98	2570	845	490
3	48	Mga1p	0.34	0.0191	1.58e-05	FUS1,HXT7,DSF1,YHR022C,HXT4,YHR210C,OPT1,MSN4,YKR075C,MHT1,HSP104,SSA2,ICT1,TIS11,MET2,YNR014W,MAN2	S000003481	YGR249W	50748	9.99	583	579	456
3	49	Rme1p	0.28	0.0216	2.17e-05	VID24,FUS1,MET32,STR3,IMA1,SUC2,RPI1,MET3,PHD1,FET3,MET2,YNR014W,PFK27,SAM3	S000003276	YGR044C	33902.6	7.12	1441	441	300
3	50	Cup2p	0.3	0.0202	2.71e-05	HXT7,DSF1,GSY1,FMP48,MUP1,YHR022C,HXT4,RPI1,HSP104,ICT1,TIS11,HXT2,FET3,YNR068C,CLN3	S000003134	YGL166W	24428	7.84	1453	641	225
3	51	Rgm1p	0.26	0.022	3.42e-05	HXT7,GSY1,HXT4,SUC2,RPI1,MSN4,HSP104,ICT1,FET3,YNR068C,MAN2,PFK27,IRC10	S000004794	YMR182C	23865.6	10.01	1601	969	211
3	52	Stp1p	0.32	0.0184	4.77e-05	VID24,EMI2,STR3,MUP1,RPI1,MET28,OPT1,MET3,PHD1,UGP1,MMP1,ICT1,TIS11,YMR320W,MET2,IRC10	S000002871	YDR463W	58088.6	7.58	1005	437	519
4	53	Cst6p	0.875	0.0047	1.79e-05	ARO4,HXT3,HXK2,SCW4,HXT1,YJL218W,GPM1,KTI12,SHM2,RPS31,RPP0,ADE17,MF(ALPHA)1,YBL111C	S000001298	YIL036W	65266.2	8.22	2514	1274	587
4	54	Rgt1p	0.375	0.0134	2.52e-05	HXT3,HXK2,SCW4,HXT1,RPP0,MF(ALPHA)1	S000001521	YKL038W	128245	8	520	503	1170
