# Supplementary material for: SWI/SNF senses carbon starvation with a pH-sensitive low-complexity sequence
Source: eLife. 2022 Feb 7;11:e70344. doi: 10.7554/eLife.70344 (PMC8890752; doi:10.7554/eLife.70344)
Supplement: Supplementary file 4. [file elife-70344-supp4.xlsx]

## Sheet: Sheet1
Gene	Start	End	Sequence
SNF5 (WT)	71	120	SPPPQTHQSPPPPPQQSQPIANQSATSTPPPPPAPHNLHPQIGQVPLAPA
SNF5 (H2A)	71	120	SPPPQTHQSPPPPPQQSQPIANQSATSTPPPPPAPANLAPQIGQVPLAPA
SNF5 (WT)	195	233	QQQQLRNQIQRQQQQQFRHHVQIQQQQQKQQQQQQQHQQ
SNF5 (H2A)	195	233	QQQQLRNQIQRQQQQQFRAAVQIQQQQQKQQQQQQQHQQ
