# Supplementary material for: SWI/SNF senses carbon starvation with a pH-sensitive low-complexity sequence
Source: eLife. 2022 Feb 7;11:e70344. doi: 10.7554/eLife.70344 (PMC8890752; doi:10.7554/eLife.70344)
Supplement: Supplementary file 5. [file elife-70344-supp5.xlsx]

## Sheet: Sheet1
Name	Droplet radius (Å)	Number of replicas	Steps per replica	Equilibration steps
SNF571-120 WT	94	20	125000000	5000000
SNF571-120 H2A	94	20	125000000	5000000
SNF5195-233 WT	94	700	20000000	15000000
SNF5195-233 H2A	84	700	20000000	15000000
