# Supplementary material for: SWI/SNF senses carbon starvation with a pH-sensitive low-complexity sequence
Source: eLife. 2022 Feb 7;11:e70344. doi: 10.7554/eLife.70344 (PMC8890752; doi:10.7554/eLife.70344)
Supplement: Supplementary file 6. [file elife-70344-supp6.xlsx]

## Sheet: Sheet2
Strain	Genotype
LH2145	WT, Mat a from sporulation of BY4743: ura3∆0 his3∆0 leu22∆0 met15∆0
LH2090	ΔQsnf5::kanMX6
LH2971	SNF5-TAP-His3MX6
LH2973	ΔQsnf5-TAP-His3MX6
LH2974	HtoAsnf5-HIS3
LH2975	HtoAsnf5-TAP-kanMX6
LH2991	ADH2::PADH2-mCherry-URA3
LH2992	ΔQsnf5-kanMX6 ADH2::PADH2-mCherry-URA3
LH2993	HtoAsnf5-HIS3 ADH2::PADH2-mCherry-URA3
LH3486	met15∆0 SNF5::kanMX6 (CEN/ARS-SNF5::URA3)
LH3513	snf5Δ::kanMX6 ADH2::PADH2-mCherry-URA3 (CEN/ARS-SNF5::URA3)
LH3632	snf5Δ::kanMX6 ADH2::PADH2-mCherry-URA3 TRP1::pHluorin-natMX6 (CEN/ARS-SNF5::URA3)
LH3647	ADH2::PADH2-mCherry-URA3 snf2::SNF2-TAP-His3MX6
LH3649	ΔQsnf5-HIS3 ADH2::PADH2-mCherry-URA3 snf2::SNF2-TAP-kanMX6
LH3652	HtoAsnf5-HIS3 ADH2::PADH2-mCherry-URA3 snf2::SNF2-TAP-kanMX6
LH3705	SNF5 ADH2::PADH2-mCherry-URA3 leu2::pHluorin-LEU2
LH3707	ΔQsnf5::kanMX6 ADH2::PADH2-mCherry-URA3 leu2::pHluorin-LEU2
LH3713	HtoAsnf5-HIS3 ADH2::PADH2-mCherry-URA3 leu2::pHluorin-LEU2
