# Supplementary material for: SWI/SNF senses carbon starvation with a pH-sensitive low-complexity sequence
Source: eLife. 2022 Feb 7;11:e70344. doi: 10.7554/eLife.70344 (PMC8890752; doi:10.7554/eLife.70344)
Supplement: Supplementary file 7. [file elife-70344-supp7.xlsx]

## Sheet: Sheet2
Plasmid	Identity
pLH226	pFA6a- ΔQsnf5-GFP(S65T)-KANMX6
pLH416	pFA6a-SNF5-GFP-KANMX6
pLH887	pRS316-SNF5 (CEN/ARS plasmid)
pLH931	pFA6a-4HtoAsnf5-KANMX6
pLH963	pFA6a-SNF5-TAP-KANMX6
pLH964	pFA6a-SNF5-TAP-HIS3MX6
pLH998	pRS306-PADH2-mCherry
pLH1085	pFA6a-6HtoAsnf5-HIS3MX6
pLH1093	pFA6a-3'snf2-TAP-KANMX6
pLH1097	pRS305-PTDH3-pHluorin
pLH1206	pFA6a-3'snf2-TAP-NATMX
