# Supplementary figures and images for: SWI/SNF senses carbon starvation with a pH-sensitive low-complexity sequence
Source: eLife journal article supplement (doi:10.7554/elife.70344), 2022-02-07

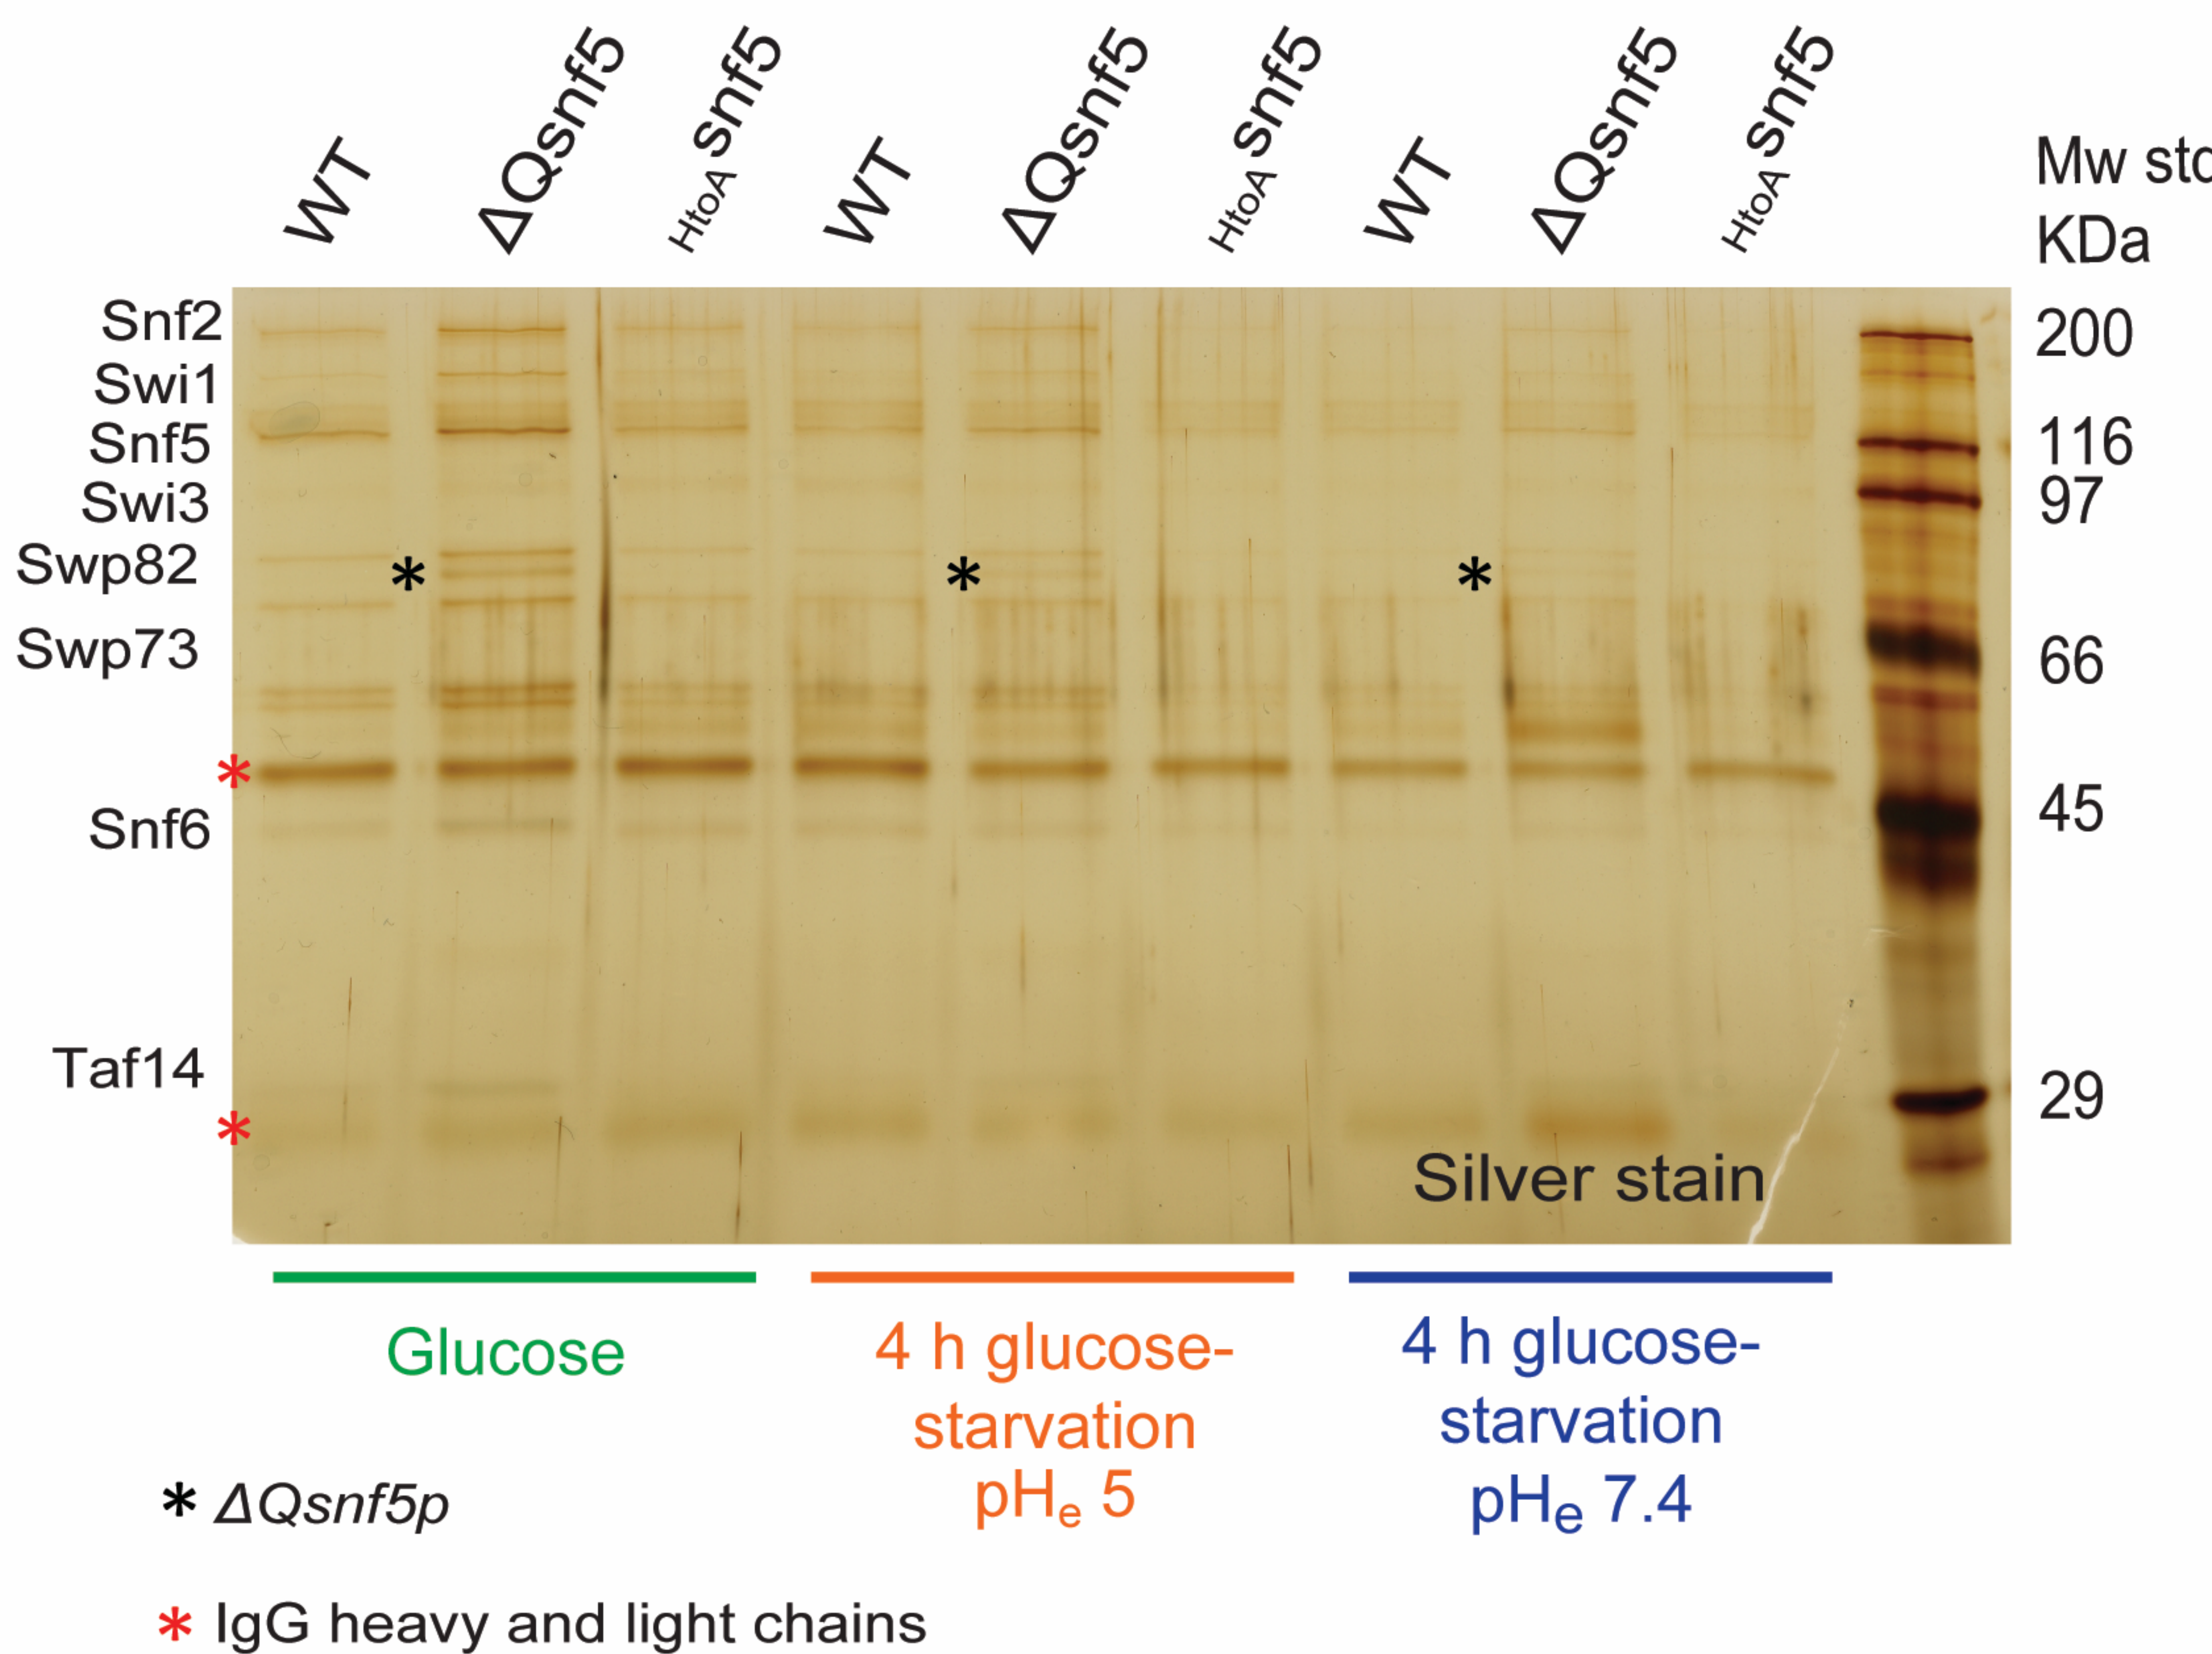

Supplement: fig1-figsupp7-data1 [file Fig1Sup7A-source-annotated.pdf › Fig1Sup7A-source-annotated.pdf]
